1 **eIF4A is stimulated by the pre-initiation complex and enhances recruitment of mRNAs regardless of structural**  
2 **complexity**

3

4 Paul Yourik<sup>1</sup>, Colin Echeverría Aitken<sup>1,3</sup>, Fujun Zhou<sup>1</sup>, Neha Gupta<sup>1,2</sup>, Alan G. Hinnebusch<sup>2,4</sup>, Jon R. Lorsch<sup>1,4</sup>

5

6 <sup>1</sup>Laboratory on the Mechanism and Regulation of Protein Synthesis, Eunice Kennedy Shriver National Institute of Child  
7 Health and Human Development, National Institutes of Health, Bethesda, MD 20892

8 <sup>2</sup>Laboratory of Gene Regulation and Development, Eunice Kennedy Shriver National Institute of Child Health and  
9 Human Development, National Institutes of Health, Bethesda, MD 20892, USA

10 <sup>3</sup>Current address: Biology Department, Vassar College, Poughkeepsie, New York 12604, USA

11 <sup>4</sup>Corresponding Author

12

13 **ABSTRACT**

14 eIF4A is a DEAD-box RNA-dependent ATPase thought to unwind RNA secondary structure in the 5'-untranslated  
15 regions (UTRs) of mRNAs to promote their recruitment to the eukaryotic translation pre-initiation complex (PIC). We  
16 show that eIF4A's ATPase activity is markedly stimulated in the presence of the PIC, independently of eIF4E•eIF4G,  
17 but dependent on subunits i and g of the heteromeric eIF3 complex. Surprisingly, eIF4A accelerated the rate of  
18 recruitment of all mRNAs tested, regardless of their degree of structural complexity. Structures in the 5'-UTR and 3' of  
19 the start codon synergistically inhibit mRNA recruitment in a manner relieved by eIF4A, indicating that the factor does  
20 not act solely to melt hairpins in 5'-UTRs. Our findings that eIF4A functionally interacts with the PIC and plays  
21 important roles beyond unwinding 5'-UTR structure is consistent with a recent proposal that eIF4A modulates the  
22 conformation of the 40S ribosomal subunit to promote mRNA recruitment.

23

24 **INTRODUCTION**

25 The goal of translation initiation is to assemble the ribosomal initiation complex containing the methionyl initiator  
26 tRNA (Met-tRNA<sub>i</sub>) at the translation start site on an mRNA. The process begins when the small (40S) subunit of the  
27 ribosome binds eIF1, eIF1A, eIF2, GTP, Met-tRNA<sub>i</sub>, eIF3, and eIF5, to assemble the 43S PIC (Dever et al., 2016). eIF1  
28 and eIF1A bind near the P and A sites of the 40S subunit, respectively, and promote loading of the ternary complex  
29 (TC) comprising eIF2, GTP, and Met-tRNA<sub>i</sub>. eIF5 is the GTPase-activating protein (GAP) for eIF2 and stimulates GTP

1 hydrolysis (Das et al., 1997, 2001; Paulin et al., 2001); however, irreversible release of the inorganic phosphate is  
2 inhibited at this stage of the pathway (Algire et al., 2005). The heteromultimeric factor eIF3 has multiple interactions  
3 with the PIC and is involved in nearly every step of translation initiation (Aitken and Lorsch, 2012; Valásek, 2012).

4         The 43S PIC is assembled in an "open" conformation (Fekete et al., 2007; Llacer et al., 2015; Maag et al., 2005,  
5 2006; Passmore et al., 2007; Pestova et al., 1998) that can bind an mRNA in a process called mRNA recruitment. eIF3  
6 and a set of mRNA recruitment factors – eIF4A, eIF4E, eIF4G, and eIF4B – facilitate this step (Mitchell et al., 2011).  
7 After initial mRNA loading, the PIC remains in an open conformation and scans the 5'- untranslated region (UTR) of  
8 the mRNA for the start codon, usually an AUG (Hinnebusch, 2014). Recognition of the start codon by the Met-tRNA<sub>i</sub>  
9 triggers a series of key steps – eviction of eIF1, movement of the C-terminal tail of eIF1A out of the P site, and  
10 subsequent release of the previously-hydrolyzed inorganic phosphate by eIF2 – ultimately shifting the PIC from an  
11 "open" to a "closed" conformation (Dever et al., 2016; Hussain et al., 2014; Llacer et al., 2015). The 48S PIC thus  
12 formed is committed to the selected start codon and joining with the large (60S) subunit of the ribosome to form the  
13 final 80S initiation complex (Acker et al., 2009; Dever et al., 2016).

14         Whereas a combination of genetic, biochemical, and structural approaches have illuminated the molecular details of  
15 PIC formation and start-codon selection, the intermediate events of mRNA recruitment are less well understood (Aitken  
16 and Lorsch, 2012). We demonstrated that the individual absence of eIF4A, eIF4B, eIF3, or the eIF4G•eIF4E complex  
17 greatly reduces the extent, the rate or both of mRNA recruitment to the PIC in a *S. cerevisiae in vitro* reconstituted  
18 translation initiation system (Mitchell et al., 2010). Structural and biochemical work indicates that eIF3 binds on the  
19 solvent side of the 40S subunit but its five core subunits have multiple interactions with other components of the PIC  
20 including distinct interactions with the mRNA near the entry and exit channels of the ribosome (Aitken et al., 2016;  
21 Llacer et al., 2015). Also, yeast eIF4B binds directly to the 40S ribosomal subunit, modulates the conformation of the  
22 ribosome near the mRNA entry channel (Walker et al., 2013), and has a functional interaction with eIF4A (Andreou and  
23 Klostermeier, 2014; Harms et al., 2014; Park et al., 2013; Walker et al., 2013). In contrast, eIF4A has not been shown to  
24 bind stably to the PIC but forms a heterotrimeric complex with eIF4G and eIF4E (eIF4A•4G•4E), collectively referred  
25 to as eIF4F, which interacts with the mRNA.

26         mRNA can form stable secondary structures via local base-pairing of complementary sequences but also has a  
27 natural tendency to form global structure, marked by a combination of entangled or compacted conformations inherent  
28 to polymers longer than their persistence lengths (Chen et al., 2012) and the sum of many, possibly dynamic, individual  
29 base-pairing and other (tertiary) interactions between both neighboring and distant parts of the molecule (Halder and

1 Bhattacharyya, 2013). Hairpin structures in the 5'-UTR are generally inhibitory to translation initiation and the prevailing  
2 model of mRNA recruitment suggests that eIF4A – localized to the 5'-end via the eIF4G–eIF4E–5'-m<sup>7</sup>G-cap chain of  
3 interactions – unwinds these hairpins to allow PIC attachment (Merrick, 2015; Pelletier and Sonenberg, 1985; Ray et al.,  
4 1985; Svitkin et al., 2001; Yoder-Hill et al., 1993).

5 eIF4A is a DEAD-box RNA-dependent ATPase thought to act as an RNA helicase (Andreou and Klostermeier,  
6 2013a; Linder et al., 1989; Schreier et al., 1977). It cooperatively binds RNA and ATP with no apparent RNA sequence  
7 specificity, and has been proposed to disrupt structures by local strand separation, possibly due to bending of the RNA  
8 duplex (Henn et al., 2012; Linder and Jankowsky, 2011). ATP hydrolysis causes a decrease in affinity of eIF4A for RNA,  
9 which may allow recycling of the factor from an eIF4A•ATP•RNA complex (Andreou and Klostermeier, 2013a;  
10 Jankowsky, 2011; Liu et al., 2008; Lorsch and Herschlag, 1998a, 1998b). Several studies demonstrated that eIF4A is able  
11 to disrupt short RNA duplexes *in vitro* (Rajagopal et al., 2012; Ray et al., 1985; Rogers et al., 1999) and more recent work  
12 suggests that eIF4A can unwind a large hairpin when the RNA is stretched between two tethers (Garcia-Garcia et al.,  
13 2015). Also, sensitivity to inhibition of translation by a dominant negative mutant of eIF4A is correlated with the degree  
14 of secondary structure in the 5'-UTR, supporting a role for eIF4A in removing structures from the 5'-end of mRNAs  
15 (Svitkin et al., 2001).

16 Nonetheless, eIF4A is a slow helicase when unwinding stable duplexes *in vitro* (Garcia-Garcia et al., 2015; Lorsch  
17 and Herschlag, 1998b; Rajagopal et al., 2012; Rogers et al., 1999) and it is difficult to envision how it supports *in vivo*  
18 rates of translation initiation in the range of 10 min<sup>-1</sup> (Palmiter, 1975; Shah et al., 2013; Siwiak and Zielenkiewicz, 2010) if  
19 this is its function. In fact, several more potent helicases appear to promote translation by resolving stable structural  
20 elements (Parsyan et al., 2011), raising the possibility that eIF4A instead performs a distinct role during initiation on all  
21 mRNAs (Gao et al., 2016). A study employing ribosome profiling to compare the *in vivo* effects of inactivating eIF4A  
22 versus Ded1 – a considerably more robust DEAD-box RNA helicase – demonstrated that translation of mRNAs with  
23 5'-UTRs possessing high degrees of structure tend to be specifically dependent on Ded1, but relatively few mRNAs are  
24 similarly hyper-dependent on eIF4A, despite comparable requirements for the two helicases in maintaining global  
25 translation initiation. Consistent with this, analysis of reporter mRNAs harboring inhibitory hairpin structures indicated  
26 that yeast eIF4A is either ineffective or dispensable in the presence of Ded1 in resolving stable, local secondary  
27 structures in the 5'-UTR (Sen et al., 2015). In a separate study, minor decreases in the normally high cellular levels of  
28 eIF4A also resulted in depressed global rates of translation (Firczuk et al., 2013), providing additional evidence that  
29 eIF4A may be important for translation of all mRNAs and must be present in excess of other components of the

1 translational apparatus. Consistent with the idea that it acts generally rather than by disrupting specific secondary  
2 structures in 5'-UTRs, eIF4A has been shown to promote translation of an mRNA possessing a short (8 nucleotide (nt))  
3 5'-UTR (Blum et al., 1992) and a viral mRNA with a low degree of structure in its 5'-UTR (Altman et al., 1990), and to  
4 stimulate 48S PIC formation on mRNAs with little secondary structure in their 5'-UTRs (Pestova and Kolupaeva, 2002).  
5 Recent experiments using a fluorescence-based equilibrium binding assay indicated that eIF4A enhances the affinity of  
6 mammalian PICs for both a natural and an unstructured model mRNA, although ATP hydrolysis was only required for  
7 this effect with the natural mRNA (Sokabe and Fraser, 2017). How the helicase and ATPase activities of eIF4A, alone or  
8 as a part of eIF4F, contribute to its role in promoting initiation on diverse mRNAs remains unclear.

9 Here – using an *in vitro* translation initiation system reconstituted from purified *S. cerevisiae* components – we  
10 examined the interplay among eIF4A, the eIF4G•eIF4E complex (hereafter referred to as “eIF4G•4E”), the mRNA,  
11 and the PIC in eIF4A-catalyzed ATP hydrolysis and mRNA recruitment. We monitored eIF4A ATPase in the context of  
12 the PIC and asked how eIF4A activity might be utilized for the recruitment of mRNAs possessing various degrees of  
13 structure, ranging from the natural (structured) *RPL41A* mRNA to short model mRNAs comprised mostly of CAA  
14 repeats expected to lack significant structure (Sobczak et al., 2010; Zuker, 2003) beyond fluctuations in polymer  
15 conformation or transient interactions (Chen et al., 2012) (hereafter called “unstructured” mRNA). We show eIF4A and  
16 eIF4A•4G•4E are both faster ATPases in the presence of the PIC and that this effect is independent of the stimulation  
17 provided by RNA or eIF4G•4E, but is dependent on the 3g and 3i subunits of eIF3. eIF4A increases the rate of  
18 recruitment for all mRNAs tested, ranging from the natural *RPL41A* mRNA to short unstructured messages. Structures  
19 in the 5'-UTR and on the 3' side of the start codon synergistically inhibit mRNA recruitment in a manner relieved by  
20 eIF4A. Our data indicate that eIF4A can relieve inhibition of mRNA recruitment arising from structure created by  
21 elements throughout the length of the mRNA rather than only resolving secondary structures in the 5'-UTR. Overall,  
22 these results are consistent with a recent model suggesting that eIF4A may modulate the conformation of the 40S  
23 ribosomal subunit to promote mRNA recruitment (Sokabe and Fraser, 2017).

24

## 25 RESULTS

### 26 ATP hydrolysis by eIF4A promotes recruitment of the natural mRNA *RPL41A* as well as a short, unstructured 27 model mRNA

28 To better understand how eIF4A-catalyzed ATP hydrolysis is related to the removal of RNA structure and  
29 mRNA recruitment, we compared the kinetics of recruitment of the natural mRNA *RPL41A* (possessing structural

1 complexity throughout its length; Figure 1 – Figure Supplement 1C) with a 50 nucleotide (nt) model mRNA made up of  
2 CAA repeats and an AUG codon at positions 24-26 (CAA 50-mer) (Aitken et al., 2016) (Figure 1 – figure supplement  
3 1A-B; see RNAs 1 and 10 in Supplementary Methods). As for most natural mRNAs, *RPLA1A* is thought to have  
4 numerous base-pairing interactions throughout its length while the CAA 50-mer is expected to have little, if any,  
5 structure (Sobczak et al., 2010; Zuker, 2003) (Figure 1 - figure supplement 1).

6 mRNA recruitment experiments were performed as described previously, using an *in vitro*-reconstituted *S.*  
7 *cerevisiae* translation initiation system and single turnover kinetics (Mitchell et al., 2010; Walker et al., 2013). Briefly, PICs  
8 containing 40S, TC, eIF1, eIF1A, eIF5, and eIF3 were formed in the presence of saturating levels of eIFs 4A, 4B, 4E,  
9 and 4G (see mRNA Recruitment Assay in Methods). Reactions were initiated by simultaneous addition of ATP and an  
10 mRNA labeled with a [<sup>32</sup>P]-7-methylguanosine (m<sup>7</sup>G) cap, enabling mRNA recruitment to the PICs and formation of  
11 48S complexes. Reaction timepoints were acquired by mixing an aliquot with a 25-fold excess of a non-radioactive  
12 ("cold") capped mRNA identical to the labeled one in the reaction, effectively stopping further recruitment of  
13 radiolabeled mRNA. The rate of dissociation of recruited mRNAs from the PIC in the presence of the cold chase  
14 mRNA was negligible for all mRNAs in the study (data not shown). Free mRNA and 48S complexes were resolved via  
15 gel electrophoresis on a native 4% THEM polyacrylamide gel (Acker et al., 2007; Mitchell et al., 2010).

16 We first compared the kinetics of recruitment for *RPLA1A* with CAA 50-mer in the presence and absence of  
17 ATP (Figure 1). In the presence of saturating ATP, the rate of recruitment of *RPLA1A* was  $0.74 \pm 0.01 \text{ min}^{-1}$  with an  
18 endpoint in excess of 90%. In contrast, in the presence of ADP, and in reactions lacking either nucleotide or eIF4A, less  
19 than 20% of *RPLA1A* mRNA was recruited after 6 hours, indicating a dramatically lower rate that could not be  
20 measured accurately due to the low reaction endpoint (Figure 1A,C). The CAA 50-mer was recruited in the absence of  
21 eIF4A and ATP at rates of about  $0.90 \text{ min}^{-1}$ , likely due to lack of significant structure, reaching endpoints around 80%.  
22 Surprisingly, the addition of eIF4A and ATP stimulated recruitment of the CAA 50-mer to a rate that could not be  
23 measured accurately by manually quenching the reaction; however, we estimate that the increase in rate was at least 4-  
24 fold ( $4.0 \pm 0.6 \text{ min}^{-1}$ ) and yielded an endpoint of 90% (Figure 1B,C).

25 To determine whether ATP hydrolysis is required for the stimulation of the rate of mRNA recruitment that we  
26 observed, we next measured the rate of recruitment with the non-hydrolyzable ATP analogs ADPCP and ADPNP, as  
27 well as with the slowly-hydrolyzable analog ATP- $\gamma$ -S (Peck and Herschlag, 2003). Neither ADPCP nor ADPNP  
28 supported stimulation of the recruitment of either mRNA by eIF4A, producing rates that were comparable to the  
29 observed rates measured in the absence of nucleotide or eIF4A (Figure 1; compare grey and blue curves to red and

1 purple). In the presence of ATP- $\gamma$ -S, recruitment of *RPL41A* and CAA 50-mer was 39-fold ( $0.019 \pm 0.001 \text{ min}^{-1}$ ) and  
2 nearly 2-fold ( $2.3 \pm 0.2 \text{ min}^{-1}$ ) slower, respectively, than in the presence of ATP; however, both mRNAs achieved  
3 endpoints of approximately 80%, consistent with previous observations that eIF4A is capable of utilizing ATP- $\gamma$ -S (Peck  
4 and Herschlag, 2003). Taken together, these results suggest that ATP hydrolysis by eIF4A stimulates the recruitment of  
5 both a natural mRNA harboring structure throughout its sequence and the short unstructured CAA 50-mer.

6

### 7 **The ATPase activity of eIF4A•4G•4E is increased by the PIC**

8       Because of the importance of ATP hydrolysis for the ability of eIF4A to stimulate recruitment of both  
9 structured and unstructured mRNAs, we next investigated how the mRNA and PIC influence the ATPase activity of  
10 eIF4A and the eIF4A•4G•4E heterotrimer. Single turnover conditions in which the concentration of enzyme is  
11 saturating and greater than the concentration of the substrate, similar to those employed in the mRNA recruitment  
12 experiments above (Figure 1), would be ideal to study the ATPase activity for comparison. However, such an approach  
13 was technically not feasible because the low affinity of yeast eIF4A for ATP (Rajagopal et al., 2012) made it impossible  
14 to create conditions where eIF4A is saturating for ATP binding and stoichiometric to or in excess of ATP. Using  
15 saturating ATP under experimentally accessible concentrations of PIC and eIF4A led to a situation in which the first few  
16 turnovers of ATP hydrolysis produced by any possible eIF4A•PIC complexes would be below the limit of detection  
17 using either radioisotope or spectrophotometric ATPase assays. In addition, based on the high ( $\sim 5 \mu\text{M}$ ) concentration of  
18 eIF4A required to achieve maximal rates of mRNA recruitment, we also could not achieve a situation in which PICs  
19 were saturating over eIF4A because such concentrations of PICs are not experimentally achievable. Thus, we were not  
20 able to perform pre-steady state kinetic ATPase experiments. Instead, to inquire whether the ATPase activity of eIF4A is  
21 affected by the presence of the PIC, we used multiple turnover conditions in which  $[\text{eIF4A}] \ll [\text{ATP}]$  in the *in vitro*  
22 reconstituted translation initiation system. Although steady-state kinetics do not allow direct comparison to single-  
23 turnover mRNA recruitment assays, the approach still enables detection of the effects of other components of the  
24 system on repeated cycles of ATP hydrolysis by eIF4A and eIF4A•4G•4E. Thus, if the PIC in the absence of mRNA  
25 (i.e., prior to mRNA recruitment) or the presence of mRNA (i.e., during and after mRNA recruitment) promotes a state  
26 of eIF4A with altered ATPase activity, it should be possible to detect it using this approach.

27       ATPase was monitored with an enzyme-coupled assay in which pyruvate kinase and lactate dehydrogenase are  
28 used to regenerate ATP from ADP and, in the process, oxidize NADH to NAD<sup>+</sup>, producing a change in absorbance at  
29 340 nm (Bradley and De La Cruz, 2012; Kiianitsa et al., 2003); (Figure 2 – figure supplement 1A; see Materials and

1 Methods). Reactions with varying concentrations of mRNA were assembled in a 384-well plate and initiated by addition  
2 of saturating ATP (5 mM). NADH absorbance at 340 nm was recorded every 20 seconds using a microplate reader. By  
3 titrating mRNA, we determined the first-order rate constant ( $k_{cat}$ ) of ATP hydrolysis at saturating mRNA and ATP  
4 concentration, as well as the concentration of mRNA needed to achieve the half-maximal velocity of ATP hydrolysis  
5 ( $K_m^{RNA}$ ). For eIF4A alone (5  $\mu$ M) the  $k_{cat}$  was  $0.48 \pm 0.04 \text{ min}^{-1}$  (Figure 2A), comparable to a previously reported value of  
6  $0.20 \pm 0.05 \text{ min}^{-1}$  (Rajagopal et al., 2012). Also, congruent with previous findings (Hilbert et al., 2011; Oberer et al.,  
7 2005; Rajagopal et al., 2012), the addition of co-purified full length eIF4G1 and eIF4E (eIF4G•4E) to eIF4A, forming  
8 the eIF4A•4G•4E heterotrimer, resulted in a 6.5-fold increase in the  $k_{cat}$  (Figure 2A, open squares vs. Figure 2B, closed  
9 squares). Whereas addition of saturating mRNA increased the ATPase activity of eIF4A alone by only 2-fold in the  
10 absence of eIF4G•4E (Figure 2A), a larger (15-fold) increase in  $k_{cat}$  occurred in the presence of eIF4G•4E (Figure 2B,  
11 closed squares).

12 Addition of the PIC to eIF4A•4G•4E in the absence of mRNA increased the  $k_{cat}$  24-fold over the value in the  
13 absence of the PIC (Figure 2B; compare closed circles and closed squares, respectively, at 0  $\mu$ M mRNA). This  
14 enhancement could be due to the presence of rRNA and tRNA in the PIC components. However, at saturating  
15 concentrations of mRNA, the PIC components still enhance the  $k_{cat}$  for ATP hydrolysis by eIF4A•4G•4E by 3.4-fold  
16 (Figure 2B, compare closed circles to closed squares), indicating that there is an enhancement of ATPase activity not due  
17 to non-specific stimulation by RNA but instead caused by one or more components of the PIC. Leaving out 40S  
18 subunits from the PIC components resulted in a 2-fold lower  $k_{cat}$  at saturating mRNA compared to the value observed  
19 in the presence of a complete PIC (Figure 2B; compare closed and open circles). Replacing capped *RPL11A* mRNA  
20 with uncapped mRNA yielded similar results (Figure 2 – figure supplement 1B), indicating that the 5'-cap is not critical  
21 for the observed stimulation by the PIC or mRNA.

22 In order to determine which components are responsible for this stimulation of the ATPase activity of  
23 eIF4A•4G•4E, we repeated the experiments at a saturating mRNA concentration (0.5  $\mu$ M), omitting various  
24 components alone or in combination. We also varied the ATP concentration to determine both the  $k_{cat}$  (Figure 2C) and  
25 the concentration of ATP required to achieve the half-maximal velocity ( $K_m^{ATP}$ ) (Figure 2 – figure supplement 1). The  
26  $k_{cat}$  for eIF4A•4G•4E was  $2.4 \pm 0.1 \text{ min}^{-1}$  and adding the 40S subunit and TC (comprising eIF2, GDPNP, and Met-  
27 tRNA<sub>i</sub>) – which alone are not sufficient to form the PIC – did not have any additional effect. However, adding the  
28 complete PIC increased the  $k_{cat}$  by 3.4-fold to  $8.2 \pm 0.3 \text{ min}^{-1}$  (Figure 2C, compare, "4A•4G•4E" and "TC, 40S,  
29 4A•4G•4E" to "Complete PIC"), while the  $K_m^{ATP}$  values ranged from 250  $\mu$ M to 330  $\mu$ M (Figure 2 – figure supplement



1 1C). Also, omission of eIF4A from an otherwise Complete PIC resulted in a  $\geq 67$ -fold decrease in the rate of ATPase as  
2 compared to the Complete PIC (to the limit of detection of the assay), ruling out any significant ATPase contamination  
3 in any of the PIC components (Figure 2C, "-4A").

4 As with the omission of 40S ribosomal subunits, leaving out eIF2 decreased the  $k_{cat}$  by  $\sim 2$ -fold (Figure 2C;  
5 compare solid red "Complete PIC" to cross-hatched, light red "-40S" and "-2" bars), indicating that each of these core  
6 components of the PIC is needed for full stimulation. Omitting eIF3, which binds tightly to the 43S PIC, contacting  
7 both the 40S subunit and multiple factors, decreased ATPase stimulation by 2.5-fold (Figure 2C, compare solid red  
8 "Complete PIC" bars to cross-hatched, light red "-3" bar). The combined absences of 40S subunits with eIF2 or eIF3  
9 resulted in similar decreases in  $k_{cat}$  as compared to the Complete PIC (Figure 2C; "-2, -40S" "-3, -40S"), suggesting that  
10 eIF3 bound to a 43S PIC is the functional unit of activation. Consistent with this conclusion, eIF3 by itself was not  
11 sufficient to significantly increase the  $k_{cat}$  of eIF4A•4G•4E (Figure 2C, compare "eIF4A•4G•4E", "3, 4A•4G•4E" and  
12 "Complete PIC").

13 In contrast to the core 43S PIC components and eIF3, leaving out eIF4B or eIF5 had no effect on the  
14 stimulation of the ATPase activity of eIF4A•4G•4E. Neither factor is required for formation of a stable PIC or binding  
15 of eIF3 to the complex, consistent with the proposal that it is the 43S PIC bound to eIF3 that stimulates the ATPase  
16 activity.

17

### 18 eIF3 subunits g and i, critical for mRNA recruitment, are necessary for ATPase stimulation

19 *S. cerevisiae* eIF3 is comprised of 5 core subunits and is involved in numerous steps of translation initiation,  
20 including mRNA recruitment. Previous studies showed that yeast eIF3 is essential for mRNA recruitment both *in vitro*  
21 (Mitchell et al., 2010) and *in vivo* (Jivotovskaya et al., 2006), and that it stabilizes TC binding and promotes PIC  
22 interactions with the mRNA at both the mRNA entry and exit channels of the 40S subunit (Aitken et al., 2016). In  
23 particular, the eIF3 subunits 3g and 3i have been implicated in scanning and AUG recognition *in vivo* (Cuchalová et al.,  
24 2010) and are required for recruitment of *RPL11A* mRNA *in vitro* (Aitken et al., 2016; Valásek, 2012). Both subunits are  
25 thought to be located near the path of the mRNA on the ribosome, at either the solvent or intersubunit face of the 40S  
26 subunit, and may undergo large alterations in position during initiation (Aylett et al., 2015; des Georges et al., 2015;  
27 Llacer et al., 2015). In the presence of PICs formed with the heterotrimer of eIF3 subunits 3a, 3b, and 3c – but lacking  
28 the 3g and 3i subunits – the  $k_{cat}$  was  $3.9 \pm 0.3 \text{ min}^{-1}$ , which is similar to the rate constant observed in the absence of the  
29 entire eIF3 complex (Figure 2C and Figure 2 – figure supplement 1C, "-3" vs. "-3g, -3i"). Thus, although the



1 heterotrimeric eIF3a•3b•3c subcomplex binds to the PIC under our experimental conditions (Aitken et al., 2016) it does  
2 not increase the ATPase  $k_{cat}$ , indicating an important role for the eIF3i and eIF3g subunits in promoting ATPase  
3 activity. One possible scenario is that eIF3g and eIF3i interact with eIF4A near the mRNA entry channel of the 40S  
4 subunit, either directly or indirectly, and this interaction promotes ATP hydrolysis and mRNA recruitment.

5

### 6 **The presence of the 43S PIC and eIF3 increases eIF4A ATPase activity in the absence of eIF4G•4E**

7 We next asked if the PIC could stimulate the ATPase activity of eIF4A in the absence of eIF4G•4E. eIF4A on  
8 its own, in the presence of saturating *RPL41A* mRNA but in the absence of any PIC components or eIF4G•4E, had a  
9  $k_{cat}$  of  $0.58 \pm 0.08 \text{ min}^{-1}$  in these experiments (titrating the concentration of ATP). Addition of the PIC, without  
10 eIF4G•4E, resulted in a 6-fold increase in  $k_{cat}$  over eIF4A alone (Figure 2D and Figure 2 – figure supplement 1D, “4A”  
11 vs. “Complete PIC -4G, -4E”). Remarkably, this stimulation is even greater than the stimulation of eIF4A•4G•4E by the  
12 PIC (3.4-fold) and of eIF4A by the eIF4G•4E complex alone (4.0-fold; Figure 2 – figure supplement 1C,D). Thus the  
13 PIC components markedly enhance the activity of eIF4A even when it is not associated with the eIF4G•4E complex.

14 We next asked which PIC components are critical for this eIF4G•4E-independent stimulatory mechanism.  
15 Eliminating the 40S subunit, eIF2, eIF3, or the 3g and 3i subunits of eIF3 in the absence of eIF4G•4E abrogated all  
16 stimulation of ATPase activity, yielding  $k_{cat}$  values the same as observed with eIF4A alone ( $\sim 0.6 \text{ min}^{-1}$ ; Figure 2D,  
17 compare dark blue bar to light blue cross-hatched bars). Congruent with our earlier results, these data suggest that  
18 stimulation of the ATPase activity of eIF4A, in the absence of eIF4G•4E, also requires the complete 43S PIC and eIF3,  
19 in particular subunits 3i and 3g. This result suggests the possibility that eIF4A can interact directly with one or more  
20 components of the PIC – for example, eIF 3i and 3g – independently of interactions that might be mediated by eIF4G;  
21 and its interactions with the PIC or eIF4G•4E confer comparable stimulation of eIF4A’s ATPase activity (6.0-fold vs.  
22 4.0-fold).

23

### 24 **$K_m$ values suggest distinct mechanisms of eIF4A activation by the PIC components and eIF4G•4E**

25 Formation of the eIF4A•4G•4E complex reduces the  $K_m$  for ATP in ATP hydrolysis by an order of  
26 magnitude, from 2500  $\mu\text{M}$  to 250  $\mu\text{M}$  (Figure 2 – figure supplement 1C, D, compare “4A” to “4A•4G•4E”). In contrast  
27 to the effect of eIF4G•4E, adding the complete PIC to eIF4A does not reduce the  $K_m$  for ATP; and, as might be  
28 expected, leaving out the 40S subunits, eIF2 or eIF3 from the PIC does not increase the  $K_m$  (Figure 2 – figure  
29 supplement 1C, D). Thus, although both the PIC components and eIF4G•4E increase eIF4A’s  $k_{cat}$  for ATP hydrolysis,

1 only eIF4G•4E reduces the  $K_m$  for ATP, suggesting different mechanisms of stimulation. The effect of eIF4G•4E is  
2 consistent with the proposal that eIF4G acts as a “soft clamp” to juxtapose the two eIF4A RecA-like domains to  
3 enhance ATP binding and catalysis (Hilbert et al., 2011; Oberer et al., 2005; Schütz et al., 2008). By contrast, the PIC  
4 components apparently act in a manner that enhances the rate-limiting step of ATP hydrolysis without affecting ATP  
5 binding.

6

### 7 **eIF4A relieves inhibition of recruitment produced by structures throughout the length of mRNAs**

8 Having established that ATP hydrolysis by eIF4A accelerates the rate of recruitment of both the natural mRNA  
9 *RPLA1A* and an unstructured 50-mer made up of CAA repeats (Figure 1) and that intact PICs activate steady-state ATP  
10 hydrolysis by eIF4A (Figure 2), we next set out to probe the effects of mRNA structure on the recruitment process and  
11 action of eIF4A. To this end, we created a library of *in vitro* transcribed and individually purified mRNAs spanning a  
12 range of structures and lengths. This library contains model mRNAs comprised almost entirely of CAA repeats,  
13 containing or lacking a 9 base pair (bp) hairpin in the 5'-UTR, and/or a natural *RPLA1A* mRNA sequence downstream  
14 of the AUG in place of CAA repeats (Figure 3A; Supplementary Methods). The *RPLA1A* sequence is expected to have  
15 structure throughout its length (Figure 1 – figure supplement 1C). We measured the recruitment kinetics for each  
16 mRNA in the absence of eIF4A and as a function of eIF4A concentration (see "mRNA Recruitment Assay" in  
17 Methods) and determined the maximal rate ( $k_{max}$ ) and concentration of eIF4A required to achieve the half-maximal rate  
18 ( $K_{1/2}^{eIF4A}$ ) (Figure 3 – figure supplement 1).

19 Using an eIF4A concentration determined to be saturating for all ten mRNAs (Figure 3 – figure supplement 1),  
20 we observed recruitment endpoints between 85%-95% with all mRNAs tested (Figure 3B, black bars). In the absence of  
21 eIF4A, however, the extent of recruitment varied widely among the mRNAs. Less than 10% of *RPLA1A* mRNA was  
22 recruited in reactions lacking eIF4A (Figure 3B, RNA 10, red bar), consistent with the low levels of *RPLA1A*  
23 recruitment we observed in the absence of ATP (Figure 1A). Varying the concentration of eIF4A yielded a  $k_{max}$  of  $1.3 \pm$   
24  $0.1 \text{ min}^{-1}$  (Figure 3C) and  $K_{1/2}^{eIF4A}$  of  $3.7 \pm 1.0 \mu\text{M}$  for recruitment of *RPLA1A* mRNA (Figure 3 – figure supplement  
25 1B,E). In the absence of eIF4A, time courses with *RPLA1A* mRNA could not be accurately fit with a single-exponential  
26 kinetic model due to low reaction endpoints. However, comparison of estimated initial rates (no eIF4A,  $0.22 \pm 0.07 \text{ min}^{-1}$ ;  
27 saturating eIF4A,  $41 \pm 1 \text{ min}^{-1}$ ) of recruitment of *RPLA1A* revealed that recruitment proceeds two orders of  
28 magnitude more rapidly in the presence of saturating levels of eIF4A versus in the absence of eIF4A (Figure 3D, RNA  
29 10).

1 Consistent with our observation that the unstructured CAA 50-mer mRNA is efficiently recruited even in the  
2 absence of ATP, we observed  $74 \pm 1$  % recruitment of this mRNA in the absence of eIF4A (Figure 3A-B, RNA 1, red  
3 bar). Nonetheless, the addition of saturating eIF4A increased the extent of recruitment to  $87 \pm 1$  % (Figure 3A-B, RNA  
4 1, black bar) consistent with our observation that the addition of ATP and eIF4A slightly elevates the extent of  
5 recruitment of this mRNA above the levels observed in the absence of ATP or eIF4A (Figure 1B). Beyond this modest  
6 stimulation of recruitment extent, saturating eIF4A markedly accelerated the rate of CAA 50-mer recruitment, yielding a  
7  $k_{\max}$  of  $6.2 \pm 1.0$  min<sup>-1</sup> (Figure 3C, RNA 1), ~7-fold higher than the rate of CAA 50-mer recruitment in the absence of  
8 eIF4A ( $0.9 \pm 0.1$  min<sup>-1</sup>) (Figure 3D, RNA 1). Relative to *RPL41A* mRNA, this acceleration is achieved at lower levels of  
9 eIF4A ( $K_{1/2}^{eIF4A}$  of  $0.70 \pm 0.2$   $\mu$ M vs.  $3.7 \pm 1.0$   $\mu$ M with *RPL41A*; Figure 3 – figure supplement 1B,E, RNAs 1 & 10).

10 To compare the CAA 50-mer with a longer mRNA, we increased the total mRNA length to 250 nucleotides  
11 (250-mer) by adding 200 nucleotides of CAA repeats downstream of the AUG (Figure 3A, RNA 2). In the absence of  
12 eIF4A, we observed  $66 \pm 10$  % extent of recruitment – which increased to >90% in the presence of eIF4A –  
13 comparable to the results seen for the CAA 50-mer in the absence of eIF4A (Figure 3B, red vs. black bars, RNA 1 vs. 2).  
14 The  $k_{\max}$  was  $3.3 \pm 0.4$  min<sup>-1</sup>, approximately 2-fold slower than that for the CAA 50-mer, whereas the  $K_{1/2}^{eIF4A}$  values  
15 were indistinguishable for the two mRNAs (Figure 3 – figure supplement 1E). Importantly, eIF4A strongly stimulated  
16 the rate of recruitment of this mRNA, in this case by 13-fold (Figure 3D, RNA 2). Similar results were obtained for two  
17 additional CAA-repeat 250-mers with the AUG situated 67 or 150 nucleotides from the 5'-end (Figure 3A, RNAs 3 and  
18 4). These mRNAs had extents of recruitment of 60-70% in the absence of eIF4A, which increased to >90% in the  
19 presence of saturating eIF4A (Figure 3B, RNAs 3-4, red vs. black bars). Furthermore, the  $k_{\max}$  for mRNA recruitment in  
20 the presence of saturating eIF4A (Figure 3C, RNAs 3-4) were 22- and 7-fold greater than the observed rates in the  
21 absence of eIF4A (Figure 3D, RNAs 3-4). The  $k_{\max}$  values and degree of stimulation by eIF4A varied by  $\leq 2$ -fold among  
22 RNAs 1-4. The reason for these differences is not clear, but does not seem to correlate with overall mRNA length or  
23 number of nucleotides 5' or 3' to the AUG. In summary, all four unstructured CAA-repeat mRNAs that we studied can  
24 be recruited by the PIC at appreciable levels independently of eIF4A, but eIF4A still stimulates their rates of recruitment  
25 by roughly an order of magnitude.

26 To probe the effects of defined, stable secondary structures on the functioning of eIF4A in mRNA  
27 recruitment, we examined 250-mer mRNAs comprising CAA repeats throughout the sequence except for a single 21-nt  
28 insertion predicted to form a 9 bp hairpin of -10 kcal/mol stability (Zuker, 2003), situated in the 5'-UTR either  
29 proximal or distal to the 5'-cap (Figure 3A, RNAs 5-6, Key; Supplementary Methods). Both cap-proximal and cap-distal

1 insertions of this 21-nt sequence into the 5'-UTR of a luciferase reporter conferred strong inhibition of reporter mRNA  
2 translation in yeast cells (Sen et al., 2016). We confirmed the presence and location of the single hairpin in RNAs 5 and 6  
3 and absence of significant secondary structure in RNA 4 by incubating RNAs 4-6 at 26°C with a 3'-5' RNA exonuclease,  
4 ExoT, specific for single-stranded RNA (Figure 3 – figure supplement 2); (Deutscher et al., 1984; Zeng and Cullen,  
5 2004).

6 To our surprise, in the absence of eIF4A, neither the cap-proximal nor the cap-distal hairpins significantly  
7 influenced the extent of recruitment, achieving endpoints between 70% and 80%, comparable to the unstructured CAA  
8 50-mer and 250-mer RNAs (Figure 3B, RNAs 5-6 vs. 1-4). The maximal rates in the presence of eIF4A for both hairpin-  
9 containing mRNAs (RNAs 5-6) were ~2-fold lower than for the CAA 250-mers lacking the hairpin (RNAs 1-4) but the  
10  $k_{\max}$  values were 2-3-fold higher than the  $k_{\max}$  for *RPL41A* (Figure 3C, RNAs 5-6 vs. 10). The  $K_{1/2}^{eIF4A}$  values for RNAs 5  
11 and 6 were  $0.20 \pm 0.01 \mu\text{M}$  and  $0.10 \pm 0.02 \mu\text{M}$ , respectively. Saturating eIF4A stimulated the rate of recruitment for  
12 both cap-proximal and cap-distal hairpin mRNAs but, surprisingly, to a lesser degree than in the absence of the hairpin:  
13 between 3- and 4-fold as opposed to 7-fold for RNA 4 containing an unstructured 5' UTR of similar length (Figure 3D,  
14 RNA 4 vs. 5-6). Thus, at odds with the expectation that stable structures in the 5'-UTR would impose strong obstacles  
15 to mRNA recruitment to the PIC, we found that addition of a cap-proximal or cap-distal hairpin in the 5'-UTR of an  
16 otherwise unstructured mRNA confers little or no inhibition of the extent of recruitment and only a modest reduction in  
17 the rate, in the presence or absence of eIF4A. Moreover, the observation that these hairpins in the 5'-UTR actually  
18 decrease the enhancement of the rate of mRNA recruitment provided by eIF4A relative to what we observed with the  
19 unstructured mRNA (Figure 3D, RNAs 5-6 vs. 4) is not readily consistent with the idea that the factor's predominant  
20 function is to unwind stable secondary structures in the 5'-UTRs of mRNAs to facilitate PIC attachment. If this were the  
21 case, one might have expected larger rate enhancements for mRNAs with stable structures in their 5'-UTRs than for  
22 mRNAs containing little inherent structure, the opposite of what we actually observe. It is possible that eIF4A is not  
23 efficient at unwinding such stable structures, which results in a lower  $k_{\max}$  and a lower degree of stimulation.

24 To probe further the effects of RNA structural complexity on mRNA recruitment and eIF4A function, we  
25 examined a chimeric mRNA comprising CAA-repeats in the 5'-UTR and the natural sequence (with associated structural  
26 complexity) from *RPL41A* 3' of the AUG start codon (Figure 3A, RNA 7). In the absence of eIF4A, this mRNA was  
27 recruited to the PIC with an observed rate of  $0.06 \pm 0.01 \text{ min}^{-1}$ , which is significantly slower than for RNAs 1-6 (~0.2-  
28 0.9  $\text{min}^{-1}$ ), but faster than the rate for full-length *RPL41A* mRNA, which as noted above could not be determined due  
29 to its low endpoint of recruitment (Figure 3 – supplement 1B,E RNAs 1-6, 10 vs. 7). In contrast, in the presence of

1 saturating eIF4A the  $k_{\max}$  for RNA 7 was comparable to the  $k_{\max}$  values observed with RNAs 2, 3, 5 and 6 and within 2-  
2 fold of the values for RNAs 1 and 4. Thus, addition of saturating eIF4A conferred a 60-fold increase in the rate of  
3 recruitment for RNA 7, a greater degree of stimulation than observed with RNAs 1-6 (Figure 3D). These results indicate  
4 that eIF4A can efficiently resolve inhibition of mRNA recruitment mediated by RNA sequences on the 3' side of the  
5 start codon, which are not predicted to form stable secondary structures with the 5'-UTR (Figure 1 – figure supplement  
6 1D) (Zuker, 2003). In addition, the  $K_{1/2}^{eIF4A}$  for RNA 7 ( $1.8 \pm 0.9 \mu\text{M}$ ) was approximately midway between the values  
7 determined for the various unstructured model mRNAs and *RPL41A* mRNA (cf. RNAs 1-4, 7, and 10 in Figure 3 –  
8 supplement 1E), suggesting that structure on the 3' side of the start codon increases the concentration of eIF4A required  
9 to maximally stimulate recruitment.

10 In contrast to the modest effects of the hairpins when present in the otherwise unstructured RNAs 5-6, both  
11 the cap-proximal and cap-distal hairpins were strongly inhibitory to mRNA recruitment in the absence of eIF4A when  
12 inserted into the unstructured 5'-UTR of the chimeric mRNA harboring *RPL41A* sequence 3' of the AUG codon,  
13 conferring very low reaction endpoints ( $\leq 20\%$ ; Figure 3B, RNAs 8-9, red bars) and rates (Figure 3 – figure supplement  
14 1E,  $k_{\text{obs}}^{\text{no eIF4A}}$ , RNAs 8-9). Moreover, the presence of saturating eIF4A dramatically increased recruitment of both of  
15 these mRNAs to  $\sim 80\%$  (Figure 3B, RNAs 8-9, black vs. red bars) and also increased their  $k_{\max}$  values by approximately  
16 10-fold (Figure 3D, RNAs 8-9). Thus, the hairpin insertions conferred the predicted strong inhibition of PIC  
17 recruitment and marked dependence on eIF4A in the context of the chimeric mRNA containing native *RPL41A*  
18 sequences, but not in an otherwise unstructured mRNA. We note however that stimulation of the recruitment rate by  
19 eIF4A was considerably less than the 60-fold and  $\sim 190$ -fold increases observed for the chimeric mRNA lacking a  
20 hairpin (RNA 7) and for native *RPL41A* (RNA 10), respectively (Figure 3D, RNAs 8-9 vs. 7,10); and the eIF4A-  
21 stimulated maximal rates for mRNAs 8-9 also remain well below those observed for mRNA 7 and *RPL41A* mRNA  
22 (Figure 3C, RNAs 8-9 vs. 7 and 10). These differences might be explained by the inability of eIF4A to efficiently resolve  
23 these stable secondary structures, as already suggested above.

24 Comparing  $k_{\max}$  values for RNA 4 to RNAs 5-9 shows that the combined effects of structures in the 5'-UTR  
25 and 3' to the AUG (RNAs 8 and 9) is considerably more than the additive effects of either structural element alone  
26 (Figure 3C, RNAs 5-7; Figure 3 – supplement 1E). Whereas structures in the 5'-UTR (RNAs 5 and 6) or 3' to the start  
27 codon (RNA 7) on their own have 2-3-fold effects on  $k_{\max}$  relative to the unstructured RNA 4, combining them (RNAs  
28 8 and 9) produces a  $\geq 30$ -fold effect. These data indicate that structures in both regions synergistically inhibit the rate of  
29 mRNA recruitment. This synergy is also reflected in the dramatically reduced recruitment endpoints of RNAs 8-9 seen

1 in the absence of eIF4A (Figure 3A,B, red bars; RNAs 4-7 vs. 8-9). It is possible that, in the absence of significant RNA  
2 structure on the 3' side of the AUG codon, PICs are able to load directly in the unstructured region containing the AUG  
3 codon located downstream of the stem loops in RNAs 5 and 6, in a manner only slightly encumbered by the stable  
4 hairpins (Agalarov et al., 2014). When the structured *RPL41A* mRNA is present beyond the start codon in RNAs 8 and  
5 9, it may make this direct loading impossible, perhaps by sterically occluding or otherwise blocking access to the internal  
6 unstructured region, thereby forcing the PIC to attach near the 5'-cap and scan through the structured 5'-UTR to reach  
7 the AUG codon. This latter situation likely reflects the state of most (if not all) natural mRNAs, in which PICs do not  
8 have access to large segments of unobstructed, unstructured internal RNA on which to directly load.

9 The fact that eIF4A restores recruitment of RNAs 8 and 9 (Figure 3B, RNAs 8-9, black bars), albeit at  
10 relatively low recruitment rates, indicates that eIF4A can eventually resolve the synergistic inhibition produced by  
11 structures in the 5' and 3' segments of these messages. It is noteworthy, however, that eIF4A gives considerably larger  
12 rate enhancements for the mRNAs harboring only native *RPL41A* sequences (RNAs 7 and 10) than those burdened  
13 with synthetic hairpins (RNAs 5-6 and 8-9), suggesting that eIF4A is better able to resolve the complex array of relatively  
14 less stable structures in *RPL41A* compared to a highly stable local structure in the 5'-UTR.

15

## 16 **The 5'-7-methylguanosine cap imposes an eIF4A requirement for structured and unstructured mRNAs**

17 To further understand the interplay between eIF4A•4G•4E, the PIC and the mRNA during the recruitment  
18 process, we inquired how the 5'-cap – which binds the heterotrimer via eIF4E – influences the requirement for eIF4A in  
19 recruitment of various RNAs. We have previously shown that the 5'-cap enforces the requirement for several eIFs,  
20 including eIF4A, in mRNA recruitment (Mitchell et al., 2010) and more recent work in the mammalian system provided  
21 evidence that the 5'-cap-eIF4E-eIF4G-eIF3-40S network of interactions is required to promote mRNA recruitment via  
22 threading of the 5'-end into the 40S entry channel (Kumar et al., 2016). As before, we monitored the kinetics of mRNA  
23 recruitment at various concentrations of eIF4A with capped or uncapped versions of mRNAs described above,  
24 including RNA 1 (CAA 50-mer), RNA 4 (CAA 250-mer), and RNA 7 (unstructured 5'-UTR with *RPL41A* sequence 3'  
25 of the AUG; Figure 4 and Figure 4 – figure supplement 1). As summarized in Figure 4B, the  $k_{max}$  observed with  
26 saturating eIF4A was comparable with or without the 5'-cap for RNAs 1 and 7, and was 1.5-fold lower with the cap than  
27 without it for RNA 4. In contrast, in the absence of eIF4A, the rates of recruitment for uncapped versions of the  
28 unstructured model mRNAs 1 and 4 were 3.7- and 2.5-fold higher, respectively, than the rates of the corresponding 5'-  
29 capped mRNAs (Figure 4A,B; Figure 4 – figure supplement 1, compare 0  $\mu$ M eIF4A points in the inset graphs). This

1 effect was even more pronounced for RNA 7, containing natural mRNA sequence 3' of the AUG, which was recruited  
2 15-fold faster when uncapped versus capped in the absence of eIF4A. It is also noteworthy that the rate enhancement  
3 provided by eIF4A (Figure 4B,  $k_{\max}/k_{\text{obs}}^{\text{no eIF4A}}$ ) is larger in all cases for the capped mRNAs than the uncapped mRNAs,  
4 reaching an order of magnitude difference for RNA 7, and this effect is due almost entirely to the reduced rate in the  
5 absence of eIF4A for the capped versus uncapped mRNAs. Taken together, our data indicate that even for short  
6 mRNAs with low structural complexity, the 5'-cap inhibits recruitment in the absence of eIF4A, consistent with our  
7 previous observations with a natural mRNA and our proposal that the cap serves, in part, to enforce use of the canonical  
8 mRNA recruitment pathway (Mitchell et al., 2010). This effect could be due, in part, to the 5'-cap-eIF4E interaction  
9 directing the PIC to load at the 5'-end of the mRNA and impeding it from binding directly to downstream, unstructured  
10 RNA segments (Kumar et al., 2016).

11

## 12 DISCUSSION

13

### 14 The PIC stimulates eIF4A and eIF4F ATPase activities independently of eIF4G•4E but dependent on eIF3

15 In the prevailing model of mRNA recruitment, eIF4F (eIF4A•4G•4E) is localized to the 5'-end of the mRNA  
16 via the eIF4E-cap interaction, where it collaborates with eIF4B to unwind structures in the 5'-UTR (Hinnebusch, 2014).  
17 The unwound 5' end of this “activated” mRNA is then accessible for binding by the PIC, which subsequently scans  
18 down the mRNA in search of the start codon. And yet, given the natural propensity of an mRNA to form structure it is  
19 difficult to envision how an mRNA could be unwound by eIF4F and eIF4B, released into the cytoplasm and then bound  
20 by the PIC without the mRNA reforming its structure. Moreover, recent work has demonstrated that yeast eIF4B binds  
21 the ribosome itself (Walker et al., 2013) and previous evidence suggested that mammalian eIF4B interacts with rRNA  
22 (Methot et al., 1996), thus blurring the lines between the PIC and the activated mRNP composed of mRNA, eIF4F and  
23 eIF4B. In another proposed model, eIF4F and eIF4B could interact with the PIC, forming a “holo-PIC” (Aitken and  
24 Lorsch, 2012) that relaxes the mRNA and attaches to it synchronously. Some support for a model in which eIF4F  
25 interacts with the PIC to promote mRNA recruitment came from hydroxyl radical footprinting experiments that indicate  
26 eIF4G binds to the 40S subunit near the eukaryotic expansion segment 6 of the 18S rRNA (Yu et al., 2011). In addition,  
27 in mammals (but not *S. cerevisiae*) eIF4G interacts with eIF3, which could serve to bring the eIF4F complex onto the PIC  
28 (des Georges et al., 2015). Our observation that the PIC stimulates the ATPase activity of eIF4A, both in the context of  
29 the eIF4F complex and in the absence of eIF4G•4E, indicates that eIF4A and eIF4F functionally interact with the PIC,



1 and is consistent with the holo-PIC model. Although our ATPase experiments monitor steady-state kinetics and we are  
2 not able to access the pre-steady state regime that would allow us to detect any rapid burst of ATP hydrolysis that might  
3 take place during mRNA recruitment, our results still show that association with a complete PIC – in the presence or  
4 absence of mRNA – accelerates ATP hydrolysis by eIF4A, on its own and as part of the eIF4A•4G•4E complex.

5 Our studies of eIF4A ATPase activity indicated that a 43S PIC bound to eIF3 is necessary for full acceleration  
6 of ATP hydrolysis. The absence of eIFs 2 or 3, or the 40S subunit from the components required for a complete PIC  
7 significantly decreased the rate of ATP hydrolysis, whereas the presence of just the 40S subunit and TC, which alone are  
8 insufficient to form a PIC, or eIF3 alone gave no stimulation of ATP hydrolysis beyond that afforded by eIF4A•4G•4E.  
9 An eIF3 subcomplex comprised of subunits 3a, 3b, and 3c but lacking subunits 3g and 3i, resulted in a similar rate  
10 decrease as when eIF3 was omitted entirely from the reaction. The 3g and 3i subunits of eIF3 have been implicated in  
11 mRNA recruitment and scanning (Aitken et al., 2016; Cuchalová et al., 2010; Valásek, 2012), and structural data suggest  
12 that they are located near the mRNA entry channel of the 40S subunit, on either the solvent or intersubunit face (Aylett  
13 et al., 2015; des Georges et al., 2015; Llacer et al., 2015). The observation that these eIF3 subunits appear at distinct  
14 locations near the mRNA entry channel in complexes either containing or lacking mRNA has led to the speculation that  
15 they might participate in a large-scale rearrangement of the PIC important for either initial attachment to the mRNA or  
16 scanning along it (Llacer et al., 2015; Simonetti et al., 2016). Our observation that the eIF3g and eIF3i subunits are  
17 required for full stimulation of eIF4A's ATPase activity is consistent with the possibility that eIF4A is located near the  
18 mRNA entry channel, where it can promote mRNA loading onto the PIC (Spirin, 2009).

19

## 20 **eIF4A promotes recruitment of all mRNAs regardless of their degree of structure**

21 A number of observations have suggested that the function of eIF4A is to unwind structures in the 5'-UTRs of  
22 mRNAs. *In vitro*, eIF4A can unwind model RNA duplexes (Andreou and Klostermeier, 2013b; Blum et al., 1992; Grifo  
23 et al., 1983; Lorsch and Herschlag, 1998b; Ray et al., 1985; Rogers et al., 1999, 2001; Seal et al., 1983), albeit at a rate  
24 slower than necessary to support estimated rates of translation initiation in the range of 10 min<sup>-1</sup> *in vivo* (Palmiter, 1975;  
25 Shah et al., 2013; Siwiak and Zielenkiewicz, 2010). The factor is required in reconstituted translation systems for 48S PIC  
26 formation (Benne and Hershey, 1978; Pestova and Kolupaeva, 2002; Schreier and Staehelin, 1973), and in mammalian  
27 extracts the eIF4A-dependence of translation of different reporter mRNAs was correlated with their degree of 5'-UTR  
28 structure (Svitkin et al., 2001). On the other hand, eIF4A has also been shown to stimulate initiation *in vitro* on mRNAs  
29 with low degrees of 5'-UTR structure (Blum et al., 1992; Pestova and Kolupaeva, 2002), and ribosome profiling studies

1 have shown that the vast majority of mRNAs in yeast display a similar, strong dependence on eIF4A for efficient  
2 translation, whereas mRNAs with long, structured 5'-UTRs generally exhibit a special dependence on the helicase Ded1  
3 in addition to their general requirement for eIF4A (Sen et al., 2015). A recent study using a fluorescence-based  
4 equilibrium binding assay showed that mammalian eIF4A promotes recruitment of both an unstructured model mRNA  
5 and natural globin mRNA, although ATP hydrolysis was only required with the globin message (Sokabe and Fraser,  
6 2017). Thus, there was evidence that eIF4A has a general function in PIC attachment to mRNAs while playing an  
7 ancillary role for particular mRNAs burdened with 5'UTR structures. We employed the reconstituted yeast system to test  
8 this hypothesis.

9 We observed that ATP hydrolysis by yeast eIF4A accelerates recruitment of structured as well as unstructured  
10 mRNAs, and this acceleration does not correlate with the amount of secondary structure in the 5'-UTR. Taken together  
11 with our observation that the PIC accelerates ATP hydrolysis by eIF4A, one explanation for the ability of eIF4A to  
12 stimulate mRNA recruitment regardless of 5'-UTR structure would be that one function of eIF4A is to modulate the  
13 conformation of the 40S ribosomal subunit, as recently proposed by Sokabe and Fraser (Sokabe and Fraser, 2017). For  
14 instance, eIF4A might act to open the mRNA entry channel, allowing the PIC to engage with and/or move along the  
15 mRNA. Several examples of DEAD-box helicases rearranging ribonucleoprotein complexes already exist (Henn et al.,  
16 2012; Jankowsky, 2011; Linder and Jankowsky, 2011) including mammalian eIF4AIII, which is critical in formation of  
17 Exon Junction Complexes (Andersen et al., 2006; Ballut et al., 2005), and Dhx29, which binds to and is thought to  
18 modulate the structure of the mammalian ribosome (Hashem et al., 2013; Pisareva et al., 2008). Moreover, the bacterial  
19 ribosome has been demonstrated to possess intrinsic helicase activity (Qu et al., 2011; Takyar et al., 2005) and the  
20 residues responsible for this activity are preserved in the eukaryotic ribosome. In fact, we recently demonstrated that the  
21 equivalent residues in 40S protein uS3 (yeast Rps3) – which is near the 40S latch and interacts with eIF3 – stabilize the  
22 PIC-mRNA interaction (Dong et al., 2017). It is thus possible that ATP hydrolysis by eIF4A, stimulated at least in part  
23 by eIF3 subunits, might be employed to remodel this region of the 40S subunit to promote mRNA recruitment by the  
24 PIC (Figure 5A).

25

## 26 **Structural complexity beyond the 5'-UTR inhibits mRNA recruitment in a manner alleviated by eIF4A**

27 We observed that addition of native *RPL41A* mRNA sequence 3' of the start codon inhibits recruitment of  
28 mRNA to the PIC, even if the 5'-UTR is made up of CAA repeats, and this inhibitory effect is ameliorated by eIF4A.  
29 This result is surprising because in the canonical model of initiation eIF4A functions to resolve structures in the 5'-UTR.

1 We also found that, in combination, isolated hairpins in the 5'-UTR and structural complexity 3' of the AUG codon  
2 synergistically inhibit mRNA recruitment. Thus, structure created by elements beyond the 5'-UTR strongly influences  
3 the rate of mRNA recruitment to the PIC and eIF4A is able to alleviate these inhibitory effects. We envision that the  
4 *RPL41A* sequences 3' of the AUG introduce an ensemble of relatively weak secondary or tertiary interactions that  
5 occlude the 5'-UTR and start codon and thus impede direct PIC attachment and AUG recognition, and that eIF4A can  
6 efficiently resolve these structural impediments. The *RPL41A* sequences might interact directly with the 5'-UTR or  
7 simply create structures that envelop it, sterically occluding access to the 5'-UTR and the start codon. In addition, RNAs  
8 longer than their persistence length inherently fold back on themselves (Chen et al., 2012), which could further serve to  
9 create a steric block to the 5'-UTR. By binding to single-stranded segments, eIF4A may serve to increase their  
10 persistence length, helping to untangle the message. It is intriguing that eIF4A was 15- to 20-fold more effective in  
11 overcoming the inhibitory effect of the *RPL41A* sequences versus the 5'-UTR hairpins in the RNAs containing one or  
12 the other inhibitory element (RNA 7 vs. RNAs 5 and 6). This could be explained by proposing that eIF4A is more  
13 efficient at resolving the relatively weak interactions that contribute to the overall structure of an mRNA compared to  
14 highly-stable local structures. Indeed, only a handful of native mRNAs are known to possess stable hairpin structures in  
15 yeast cells (Rouskin et al., 2014), yet eIF4A is essential for translation of virtually all mRNAs *in vivo*. Moreover, it was  
16 shown that the DEAD-box RNA helicase Ded1 rather than eIF4A is required to overcome the inhibitory effects of  
17 hairpin insertions on reporter mRNA translation *in vivo* (Sen et al., 2015). Combined with these previous findings, our  
18 results support a model in which eIF4A acts to disrupt moderately stable, transient interactions throughout an mRNA  
19 that sequester the mRNA 5'-UTR or start codon within the overall mRNA structure, whereas Ded1 is more effective in  
20 resolving stable, local secondary structures in the 5'-UTR or the initiation region of an mRNA.

21

## 22 **A holistic model for eIF4A function in mRNA recruitment**

23 A possible model for eIF4A function that seems consistent with previous studies and the results presented here  
24 is shown in Figure 5B. This model is not mutually exclusive with that depicted in Figure 5A in which eIF4A modulates  
25 the structure of the 40S ribosomal subunit. In the holistic model, eIF4A – which is present in large excess of ribosomes  
26 *in vivo* (Firczuk et al., 2013) – binds to an mRNA throughout its length (Lindqvist et al., 2008) and mediates the  
27 relaxation of local structures, helping to expose the 5'-cap. The eIF4F complex associates with the cap, the 5'-end of the  
28 mRNA and the PIC. Direct loading of the PIC onto the 5'-UTR near the start codon is not possible because the start  
29 codon is still occluded within the overall structural ensemble of the mRNA and because the cap-eIF4E interaction

1 directs the PIC to the 5'-end. Interaction of the eIF4F complex with the PIC leads to an acceleration of ATP hydrolysis  
2 by the bound eIF4A. This hydrolysis event could mediate opening of the mRNA binding channel, as suggested in Figure  
3 5A, and loading of the 5'-end of the mRNA into it. It would also result in a low affinity, ADP-bound state of eIF4A that  
4 would dissociate from the mRNA, eIF4G and the PIC. During loading of the mRNA, the eIF4E-eIF4G association may  
5 be disrupted, as proposed by Pestova and colleagues (Kumar et al., 2016). Movement of the PIC on the mRNA would  
6 then lead to its encountering a new eIF4A molecule, which could then associate with eIF4G. Association of the mRNA-  
7 bound eIF4A with eIF4G and the PIC would increase its ATP hydrolysis activity by 14-fold, which would again  
8 promote mRNA loading into the 40S subunit and dissociation of eIF4A•ADP. This cycle could repeat itself until the  
9 start codon is located. The successive cycles of PIC-eIF4G-eIF4A interaction at the entry channel followed by eIF4A  
10 dissociation posited in this model could bias the directionality of scanning in the observed 5'-3' direction (Spirin, 2009).  
11 In addition, the cycling of eIF4A molecules into and out of the complex at each step is consistent with previous  
12 observations that an ATPase deficient mutant of eIF4A acts in a dominant-negative fashion to inhibit translation  
13 initiation *in vitro* (Pause et al., 1994), as the mutation would block dissociation of eIF4A molecules when they encounter  
14 eIF4G in the scanning PIC, and thereby impede progression through the 5'-UTR. Although speculative, this model  
15 brings together previous results in the field with our observations that the PIC stimulates ATP hydrolysis by eIF4A and  
16 eIF4F, that eIF4A accelerates recruitment of mRNAs regardless of their degree of structure, and that structure  
17 throughout the length of mRNAs inhibits recruitment in a manner relieved by eIF4A. It builds upon previous models  
18 for eIF4F function (Yoder-Hill et al., 1993).

19         Regardless of the model, the events we observe in our mRNA recruitment assay reflect only the first  
20 engagement of a PIC with an mRNA. Once multiple ribosomes have been loaded onto a message to form a polysome,  
21 the structure of the mRNA presumably changes dramatically, and structures on the 3' side of the start codon would play  
22 a different role than they do in early rounds of initiation. Future studies of initiation events on polysomal mRNA might  
23 reveal interesting differences from the starting phase of translation on a message.

24

25

## 26 **MATERIALS AND METHODS**

### 27 **Materials**

28         ATP, GTP, CTP, and UTP (products 10585, 16800, 14121, 23160, respectively) were purchased from  
29 Affymetrix. [ $\alpha$ -<sup>32</sup>P]-GTP was from PerkinElmer (product BLU006H250UC). ATP- $\gamma$ -S, ADPCP, and ADPNP (products

1 A1388, M7510, and A2647, respectively), S-adenosyl methionine (SAM) (product A7007), and the pyruvate kinase (900-  
2 1400 units/mL)/lactate dehydrogenase (600-1000 units/mL) mix from rabbit muscle (product P0294) were from Sigma.  
3 NADH disodium salt was from Calbiochem (product 481913). Phosphoenolpyruvate potassium salt was purchased  
4 from Chem Impex International, Inc. (product 09711). RiboLock RNase inhibitor was from Thermo Fisher Scientific  
5 (product EO0381). The RNeasy RNA purification kit was purchased from Qiagen (product 74106). Exonuclease T was  
6 purchased from New England Biolabs (product M0265S). The Abnova Small RNA Marker was purchased from Abnova  
7 (product number R0007). SYBR Gold nucleic acid gel stain (product S11494) and Novex 15% TBE-Urea gels (product  
8 EC68852BOX) were purchased from Thermo Fisher Scientific. Corning 384-well plates were purchased from VWR  
9 (product 3544).

10

## 11 **Reagent Preparation**

12 Eukaryotic initiation factors – eIFs 1, 1A, 2, 3, 4A, 4B, 4E•4G, and 5 – as well as mRNA were prepared as  
13 described previously (Walker et al., 2013). tRNA<sub>i</sub> was charged with methionine as described previously (Walker and  
14 Fredrick, 2008). Following charging, Met-tRNA<sub>i</sub> was separated from contaminating ATP and other nucleotides (left over  
15 from the charging reaction) on a 5 mL General Electric (GE) desalting column equilibrated in 30 mM Sodium Acetate  
16 (NaOAc), pH 5.5. This step was essential in order to measure the ATP dependence of mRNA recruitment and to  
17 accurately control the concentration of ATP in experiments. The Met-tRNA<sub>i</sub> and free nucleotide peaks were confirmed  
18 with individual standards prepared identically to a charging reaction. Eluted Met-tRNA<sub>i</sub> was precipitated with 3 volumes  
19 of 100% ethanol at –20°C overnight, pelleted, and resuspended in 30 mM NaOAc, pH 5.5.

20

## 21 *mRNA capping*

22 mRNAs were capped as described previously (Aitken et al., 2016). Briefly, RNAs 2-10 at 5 μM were combined  
23 with 50 μM GTP, 0.67 μM [ $\alpha$ -<sup>32</sup>P]-GTP, 100 μM S-adenosyl methionine (SAM), 1 U/μl RiboLock, and 0.15 μM  
24 D1/D12 vaccinia virus capping enzyme. RNA 1 was present at 50 μM in the reaction in the presence of 100 μM GTP,  
25 with all other conditions identical. Reactions were incubated at 37 °C for 90 minutes and purified using the RNeasy  
26 (Qiagen) RNA purification kit.

27

## 28 *mRNA Recruitment Assay*

1 *In vitro* mRNA recruitment assays were carried out as described previously with minor modifications (Aitken et  
2 al., 2016; Walker et al., 2013). All reactions were carried out at 26°C in "Recon" buffer containing 30 mM  
3 HEPES•KOH, pH 7.4, 100 mM KOAc, 3 mM Mg(OAc)<sub>2</sub>, and 2 mM DTT. 15 µl reactions contained final  
4 concentrations of 500 nM GDPNP•Mg<sup>2+</sup>, 300 nM eIF2, 300 nM Met-tRNA<sub>i</sub>, 1 µM eIF1, 1 µM eIF1A, 30 nM 40S  
5 ribosomal subunits, 300 nM eIF3, 5 µM eIF4A, 50 nM eIF4G•eIF4E, 300 nM eIF4B, and 1 U/µL Ribolock RNase  
6 inhibitor (Thermo). To form the ternary complex (TC), GDPNP and eIF2 were incubated for 10 minutes, Met-tRNA<sub>i</sub>  
7 was then added to the reaction and incubated an additional 7 minutes. The remainder of the components, except mRNA  
8 and ATP, were added to the TC and incubated for an additional 10 minutes to allow complex formation. Reactions were  
9 initiated with a mix containing final concentrations of 15 nM mRNA and ATP•Mg<sup>2+</sup>. Experiments varying the  
10 concentration of eIF4A were carried out in the presence of 5 mM ATP. Experiments varying ATP were carried out in  
11 the presence of 5 µM eIF4A. To take timepoints, 2 µl reaction aliquots were combined with 1 µl of 0.02% bromophenol  
12 blue and xylene cyanol dye in 40% sucrose containing a final concentration of a 25-fold excess of unlabeled mRNA  
13 (cold chase), identical to the labeled mRNA for that reaction. Two µl of the chased reaction were immediately loaded  
14 and resolved on a native 4% (37.5:1) polyacrylamide gel using a Hoefer SE260 Mighty Small II Deluxe Mini Vertical  
15 Electrophoresis Unit at a potential of 200 volts for 50 minutes. The electrophoresis unit was cooled to 22°C by a  
16 circulating water bath. Gels and running buffer contained 34 mM Tris Base, 57 mM HEPES, 1 mM EDTA, and 25 mM  
17 MgCl<sub>2</sub> ("THEM"). Gels were exposed to a phosphor plate overnight at -20°C, the plates visualized on a GE Typhoon  
18 9500 FLA, and the fraction of recruited mRNA bands (48S complex) versus the total signal in the lane was quantified  
19 using ImageQuant software. Data were plotted and fit using KaleidaGraph 4.5 software. Recruitment time courses were  
20 fit to a single exponential rate equation:  $y = A*(1-\exp(-k_{obs}*t))$ , where t is time, A is amplitude, and k<sub>obs</sub> is the observed  
21 rate constant. Observed rates were plotted against the concentration of the titrant and fit to a hyperbolic equation:  $y =$   
22  $b + ((k_{max} * x) / (K_{1/2} + x))$  where x is the concentration of the titrant, k<sub>max</sub> is the maximal observed rate of mRNA  
23 recruitment when the reaction is saturated by the factor titrated (e.g. eIF4A), K<sub>1/2</sub> is the concentration of the factor  
24 required to achieve 1/2V<sub>max</sub>, and b is the rate in the absence of the titrated factor (i.e., the y-intercept).

25

#### 26 *NADH-coupled ATPase Assay*

27 The NADH-coupled ATPase assay was adapted from previously described methods with some modifications  
28 (Bradley and De La Cruz, 2012; Kiiianitsa et al., 2003). All ATPase experiments were carried out in 384-well Corning  
29 3544 plates on a Tecan Infinite M1000PRO microplate reader at 26°C. Using a standard curve we determined that a 10

1  $\mu\text{L}$  reaction with 1 mM NADH on a Corning 3544 microplate gives an absorbance of 1.23 Optical Density of 340 nm  
2 light ( $\text{OD}_{340}$ ) in the microplate reader.  $\text{OD}_{340}$  was measured every 20 seconds for 40 minutes, plotted vs. time for  
3 individual reactions, and fit to  $y = mx + b$  where  $m$  is the slope,  $x$  is time in minutes, and  $b$  is the  $y$ -intercept. Thus,  $m$  is  
4  $\text{OD}_{340}$  of NADH/min. It follows that,

$$5 \quad \frac{|m| \text{ OD of NADH/min}}{1.23 \text{ OD of NADH/1mM NADH}} = \text{mM NADH/min}$$

6 Note that the absolute value of  $m$  ( $|m|$ ) was used because the slope is a negative value due to loss of absorbance over  
7 time. NADH consumed is stoichiometric with ATP regenerated thus,  $\text{mM NADH/min} = \text{mM ATP/min}$ .  $k_{\text{cat}}$  was  
8 determined by dividing the velocity of ATP by enzyme ( $5 \mu\text{M eIF4A}$ ) concentration (Fersht, 1999).

9  
10  $12 \mu\text{L}$  reactions (final volume) were assembled at final concentrations as follows: 1 mM GDPNP• $\text{Mg}^{2+}$ , 500 nM eIF2,  
11 500 nM Met-tRNA<sub>i</sub>, 1  $\mu\text{M}$  eIF1, 1  $\mu\text{M}$  eIF1A, 500 nM 40S ribosomal subunits, 500 nM eIF3, 5  $\mu\text{M}$  eIF4A, 500 nM  
12 eIF4G•4E, 500 nM eIF4B, 500 nM eIF5, 5 mM ATP• $\text{Mg}^{2+}$ , 500 nM mRNA, and 1 U/ $\mu\text{L}$  RiboLock RNase inhibitor. All  
13 incubations and experiments were performed at 26°C. PICs were formed at 2x of the final concentration in 1x Recon  
14 buffer, in the absence of mRNA and ATP. PIC formation was initiated by incubating eIF2 and GDPNP for 10 minutes,  
15 subsequently Met-tRNA<sub>i</sub> was added to the reaction and incubated for another 7 minutes. Next, eIFs 1, 1A, 40S, 3, 5, 4A,  
16 4B, 4G•4E, and RiboLock were added. Order of addition of eIFs did not make a difference. The reaction was incubated  
17 for 10 minutes to allow complex formation. Subsequently, the PICs were combined with the "Reporter Mix" containing  
18 phosphoenolpyruvate, NADH, pyruvate kinase, and lactate dehydrogenase (added as a 10x stock of the final  
19 concentrations all in 1x Recon buffer) resulting in concentrations in the final reaction of 2.5 mM phosphoenolpyruvate,  
20 1 mM NADH, and a 1/250 dilution of the pyruvate kinase (600-1,000 units/mL) and lactate dehydrogenase (900-  
21 1400 units/mL) mix (PK/LDH mix). Reactions were brought up to volume with 1x Recon buffer, such that when they  
22 were initiated by addition of mRNA (added as a 10x stock of the final concentration in 1 x Recon) and ATP• $\text{Mg}^{2+}$   
23 (added as a 4x stock of the final concentration in 1x Recon buffer) the total reaction volume was  $12 \mu\text{L}$ .  $10 \mu\text{L}$  of the  
24 reaction were then immediately transferred to the microplate for analysis by the Tecan plate reader and changes in  
25 absorbance of 340 nm light were monitored over time, taking readings every 20 seconds for 40 minutes. Because the  
26 assay measures the slope of a straight line (i.e. multiple turnover conditions), the lag in time between initiating the  
27 reaction and start of the measurements by the plate reader has no effect on the results. Initiating the reactions using an  
28 injection, capable of monitoring rapid kinetics did not reveal any differences in results; i.e., there was no evidence of a



1 "burst" phase in the initial part of the reaction. Increasing or decreasing the concentration of the PK/LDH mix by 3-  
2 fold did not influence the observed rate of ATP hydrolysis (Figure 2 – figure supplement 1A), indicating that the rate of  
3 NADH oxidation is not limited by PK/LDH activity. Also, when ATP, eIF4A, or PK/LDH was absent from the  
4 reaction, there was no change in absorbance at 340 nm over 1 hour (Figure 2 – figure supplement 1A).

#### 5 6 *Exonuclease T RNA Digest*

7 In a 20  $\mu$ l reaction 0.5 pmol/ $\mu$ l of RNA was incubated with 0.75 U/ $\mu$ l of RNase Exonuclease T in 1x NEB buffer 4 at  
8 26°C for 18 hours. RNA (4 pmol total RNA per lane) was loaded and resolved on a Novex 15% Tris Borate EDTA  
9 Urea gel and stained with SYBR Gold nucleic acid gel stain, diluted 1/10,000, for 5 minutes and visualized on a General  
10 Electric Typhoon FLA 9500.

#### 11 12 **ACKNOWLEDGMENTS**

13 The authors would like to acknowledge Tom Dever and Nicholas Guydosh for their thoughtful and critical suggestions.  
14 This work was supported by the Intramural Research Program (JRL and AGH) of the National Institutes of Health  
15 (NIH).

#### 16 17 18 **COMPETING INTERESTS**

19 The authors declare no competing interests.

#### 20 21 **REFERENCES**

- 22 Acker, M.G., Koltz, S.E., Mitchell, S.F., Nanda, J.S., and Lorsch, J.R. (2007). Reconstitution of yeast translation  
23 initiation. *Methods Enzymol.* *430*, 111–145.  
24 Acker, M.G., Shin, B.-S., Nanda, J.S., Saini, A.K., Dever, T.E., and Lorsch, J.R. (2009). Kinetic analysis of late steps of  
25 eukaryotic translation initiation. *J. Mol. Biol.* *385*, 491–506.  
26 Agalarov, S.C., Sakharov, P.A., Fattakhova, D.K., Sogorin, E. a, and Spirin, A.S. (2014). Internal translation initiation and  
27 eIF4F/ATP-independent scanning of mRNA by eukaryotic ribosomal particles. *Sci. Rep.* *4*, 4438.  
28 Aitken, C.E., and Lorsch, J.R. (2012). A mechanistic overview of translation initiation in eukaryotes. *Nat. Struct. Mol.*  
29 *Biol.* *19*, 568–576.  
30 Aitken, C.E., Beznosková, P., Vlčkova, V., Chiu, W.-L., Zhou, F., Valášek, L.S., Hinnebusch, A.G., and Lorsch, J.R.  
31 (2016). Eukaryotic translation initiation factor 3 plays distinct roles at the mRNA entry and exit channels of the  
32 ribosomal preinitiation complex. *Elife* *5*, 1–37.  
33 Algire, M. a, Maag, D., and Lorsch, J.R. (2005). Pi release from eIF2, not GTP hydrolysis, is the step controlled by start-  
34 site selection during eukaryotic translation initiation. *Mol. Cell* *20*, 251–262.  
35 Altman, M., Blum, S., Wilson, T., and Trachsel, H. (1990). The 5'-leader sequence of tobacco mosaic virus RNA  
36 mediates initiation-factor-4E-independent, but still initiation-factor-4A-dependent translation in yeast extracts. *Gene* *91*,  
37 127–129.  
38 Andersen, C.B.F., Ballut, L., Johansen, J.S., Chamieh, H., Nielsen, K.H., Oliveira, C.L.P., Pedersen, J.S., Séraphin, B.,

- 1 Hir, H. Le, and Andersen, G.R. (2006). Structure of the Exon Junction Core Complex with a Trapped DEAD-Box  
2 ATPase Bound to RNA. *Science* 313, 1968–1972.
- 3 Andreou, A.Z., and Klostermeier, D. (2013a). The DEAD-box helicase eIF4A: paradigm or the odd one out? *RNA Biol.*  
4 10, 19–32.
- 5 Andreou, A.Z., and Klostermeier, D. (2013b). SUPP eIF4B and eIF4G Jointly Stimulate eIF4A ATPase and Unwinding  
6 Activities by Modulation of the eIF4A Conformational Cycle. *J. Mol. Biol.*
- 7 Andreou, A.Z., and Klostermeier, D. (2014). eIF4B and eIF4G Jointly Stimulate eIF4A ATPase and Unwinding  
8 Activities by Modulation of the eIF4A Conformational Cycle. *J. Mol. Biol.* 426, 51–61.
- 9 Aylett, C.H.S., Boehringer, D., Erzberger, J.P., Schaefer, T., and Ban, N. (2015). Structure of a Yeast 40S–eIF1–eIF1A–  
10 eIF3–eIF3j initiation complex. *Nat Struct Mol Biol* 22, 269–271.
- 11 Ballut, L., Marchadier, B., Baguet, A., Tomasetto, C., Séraphin, B., and Le Hir, H. (2005). The exon junction core  
12 complex is locked onto RNA by inhibition of eIF4AIII ATPase activity. *Nat. Struct. Mol. Biol.* 12, 861–869.
- 13 Benne, R., and Hershey, J.W. (1978). The mechanism of action of protein synthesis initiation factors from rabbit  
14 reticulocytes. *J. Biol. Chem.* 253, 3078–3087.
- 15 Blum, S., Schmid, S.R., Pause, A., Buser, P., Linder, P., Sonenberg, N., and Trachsel, H. (1992). ATP hydrolysis by  
16 initiation factor 4A is required for translation initiation in *Saccharomyces cerevisiae*. *Proc. Natl. Acad. Sci. U. S. A.* 89,  
17 7664–7668.
- 18 Bradley, M.J., and De La Cruz, E.M. (2012). Analyzing ATP utilization by DEAD-Box RNA helicases using kinetic and  
19 equilibrium methods. *Methods Enzymol.* 511, 29–63.
- 20 Chen, H., Meisburger, S.P., Pabit, S. a., Sutton, J.L., Webb, W.W., and Pollack, L. (2012). Ionic strength-dependent  
21 persistence lengths of single-stranded RNA and DNA. *Proc. Natl. Acad. Sci.* 109, 799–804.
- 22 Cuchalová, L., Kouba, T., Herrmannová, A., Dányi, I., Chiu, W.-L., and Valásek, L. (2010). The RNA recognition motif  
23 of eukaryotic translation initiation factor 3g (eIF3g) is required for resumption of scanning of posttermination ribosomes  
24 for reinitiation on GCN4 and together with eIF3i stimulates linear scanning. *Mol. Cell. Biol.* 30, 4671–4686.
- 25 Das, S., Maiti, T., Das, K., and Maitra, U. (1997). Specific Interaction of Eukaryotic Translation Initiation Factor 5 (eIF5)  
26 with the Beta-Subunit of eIF2. *J. Biol. Chem.* 272, 31712–31718.
- 27 Das, S., Ghosh, R., and Maitra, U. (2001). Eukaryotic Translation Initiation Factor 5 Functions as a GTPase-activating  
28 Protein. *J. Biol. Chem.* 276, 6720–6726.
- 29 Deutscher, M.P., Marlor, C.W., and Zaniewski, R. (1984). Ribonuclease T: new exoribonuclease possibly involved in  
30 end-turnover of tRNA. *Proc. Natl. Acad. Sci. U. S. A.* 81, 4290–4293.
- 31 Dever, T.E., Kinzy, T.G., and Pavitt, G.D. (2016). Mechanism and regulation of protein synthesis in *Saccharomyces*  
32 *cerevisiae*. *Genetics* 203, 65–107.
- 33 Dong, J., Aitken, C.E., Thakur, A., Shin, B.-S., Lorsch, J.R., and Hinnebusch, A.G. (2017). Rps3/uS3 promotes mRNA  
34 binding at the 40S ribosome entry channel and stabilizes preinitiation complexes at start codons. *Proc. Natl. Acad. Sci.*  
35 114, E2126–E2135.
- 36 Fekete, C.A., Mitchell, S.F., Cherkasova, V.A., Applefield, D., Algire, M.A., Maag, D., Saini, A.K., Lorsch, J.R., and  
37 Hinnebusch, A.G. (2007). N- and C-terminal residues of eIF1A have opposing effects on the fidelity of start codon  
38 selection. *EMBO J.* 26, 1602–1614.
- 39 Fersht, A. (1999). *Structure and Mechanism in Protein Science* (New York, NY: W. H. Freeman and Company).
- 40 Firczuk, H., Kannambath, S., Pahle, J., Claydon, A., Beynon, R., Duncan, J., Westerhoff, H., Mendes, P., and McCarthy,  
41 J.E. (2013). An in vivo control map for the eukaryotic mRNA translation machinery.
- 42 Gao, Z., Putnam, A.A., Bowers, H.A., Guenther, U.-P., Ye, X., Kindsfather, A., Hilliker, A.K., and Jankowsky, E.  
43 (2016). Coupling between the DEAD-box RNA helicases Ded1p and eIF4A. *Elife* 5, 1–22.
- 44 García-García, C., Frieda, K.L., Feoktistova, K., Fraser, C.S., and Block, S.M. (2015). Factor-dependent processivity in  
45 human eIF4A DEAD-box helicase. *Science* 348, 1486–1488.
- 46 des Georges, A., Dhote, V., Kuhn, L., Hellen, C.U.T., Pestova, T. V, Frank, J., and Hashem, Y. (2015). Structure of  
47 mammalian eIF3 in the context of the 43S preinitiation complex. *Nature* 525, 491–495.
- 48 Grifo, J.A., Tahara, S.M., Morgan, M.A., Shatkin, A.J., and Merrick, W.C. (1983). New initiation factor activity required  
49 for globin mRNA translation. *J. Biol. Chem.* 258, 5804–5810.
- 50 Halder, S., and Bhattacharyya, D. (2013). RNA structure and dynamics: A base pairing perspective. *Prog. Biophys. Mol.*  
51 *Biol.* 113, 264–283.
- 52 Harms, U., Andreou, A.Z., Gubaev, A., and Klostermeier, D. (2014). eIF4B, eIF4G and RNA regulate eIF4A activity in  
53 translation initiation by modulating the eIF4A conformational cycle. *Nucleic Acids Res.* 42, 7911–7922.
- 54 Hashem, Y., des Georges, A., Dhote, V., Langlois, R., Liao, H.Y., Grassucci, R.A., Hellen, C.U.T., Pestova, T. V, and  
55 Frank, J. (2013). Structure of the mammalian ribosomal 43S preinitiation complex bound to the scanning factor DHX29.  
56 *Cell* 153, 1108–1119.
- 57 Henn, A., Bradley, M.J., and De La Cruz, E.M. (2012). ATP utilization and RNA conformational rearrangement by

- 1 DEAD-box proteins. *Annu. Rev. Biophys.* *41*, 247–267.
- 2 Hilbert, M., Keibel, F., Gubaev, A., and Klostermeier, D. (2011). eIF4G stimulates the activity of the DEAD box  
3 protein eIF4A by a conformational guidance mechanism. *Nucleic Acids Res.* *39*, 2260–2270.
- 4 Hinnebusch, A.G. (2014). The Scanning Mechanism of Eukaryotic Translation Initiation. *Annu. Rev. Biochem.* *83*, 779–  
5 812.
- 6 Hussain, T., Llácer, J.L., Fernández, I.S., Munoz, A., Martín-Marcos, P., Savva, C.G., Lorsch, J.R., Hinnebusch, A.G.,  
7 and Ramakrishnan, V. (2014). Structural Changes Enable Start Codon Recognition by the Eukaryotic Translation  
8 Initiation Complex. *Cell* *159*, 597–607.
- 9 Jankowsky, E. (2011). RNA helicases at work: binding and rearranging. *Trends Biochem. Sci.* *36*, 19–29.
- 10 Jivotovskaya, A., Valášek, L., Hinnebusch, A.G., and Nielsen, K.H. (2006). Eukaryotic Translation Initiation Factor 3  
11 (eIF3) and eIF2 Can Promote mRNA Binding to 40S Subunits Independently of eIF4G in Yeast. *Mol. Cell Biol.* *26*,  
12 1355–1372.
- 13 Küanitsa, K., Solinger, J.A., and Heyer, W.-D. (2003). NADH-coupled microplate photometric assay for kinetic studies  
14 of ATP-hydrolyzing enzymes with low and high specific activities. *Anal. Biochem.* *321*, 266–271.
- 15 Kumar, P., Hellen, C.U.T., and Pestova, T. V (2016). Toward the mechanism of eIF4F-mediated ribosomal attachment  
16 to mammalian capped mRNAs. *Genes Dev* *30*, 1573–1588.
- 17 Linder, P., and Jankowsky, E. (2011). From unwinding to clamping - the DEAD box RNA helicase family. *Nat. Rev.*  
18 *Mol. Cell Biol.* *12*, 505–516.
- 19 Linder, P., Lasko, P.F., Ashburner, M., Leroy, P., Nielsen, P.J., Nishi, K., Schnier, J., and Slonimski, P.P. (1989). Birth of  
20 the D-E-A-D box. *Nature* *337*, 121–122.
- 21 Lindqvist, L., Imataka, H., and Pelletier, J. (2008). Cap-dependent eukaryotic initiation factor-mRNA interactions probed  
22 by cross-linking. *RNA* *14*, 960–969.
- 23 Liu, F., Putnam, A., and Jankowsky, E. (2008). ATP hydrolysis is required for DEAD-box protein recycling but not for  
24 duplex unwinding. *Proc. Natl. Acad. Sci.* *51*, 20209–20214.
- 25 Llácer, J.L., Hussain, T., Marler, L., Aitken, C.E., Thakur, A., Lorsch, J.R., Hinnebusch, A.G., and Ramakrishnan, V.  
26 (2015). Conformational Differences between Open and Closed States of the Eukaryotic Translation Initiation Complex.  
27 *Mol. Cell* *59*, 399–412.
- 28 Lorsch, J., and Herschlag, D. (1998a). The DEAD box protein eIF4A. 2. A cycle of nucleotide and RNA-dependent  
29 conformational changes. *Biochemistry* *2960*, 2194–2206.
- 30 Lorsch, J.R., and Herschlag, D. (1998b). The DEAD box protein eIF4A. 1. A minimal kinetic and thermodynamic  
31 framework reveals coupled binding of RNA and nucleotide. *Biochemistry* *37*, 2180–2193.
- 32 Maag, D., Fekete, C. a, Gryczynski, Z., and Lorsch, J.R. (2005). A conformational change in the eukaryotic translation  
33 preinitiation complex and release of eIF1 signal recognition of the start codon. *Mol. Cell* *17*, 265–275.
- 34 Maag, D., Algire, M.A., and Lorsch, J.R. (2006). Communication between eukaryotic translation initiation factors 5 and  
35 1A within the ribosomal pre-initiation complex plays a role in start site selection. *J. Mol. Biol.* *356*, 724–737.
- 36 Merrick, W.C. (2015). eIF4F: A Retrospective. *J. Biol. Chem.* *290*, 24091–24099.
- 37 Methot, N., Pickett, G., Keene, J.D., and Sonenberg, N. (1996). In vitro RNA selection identifies RNA ligands that  
38 specifically bind to eukaryotic translation initiation factor 4B: the role of the RNA motif. *RNA* *2*, 38–50.
- 39 Mitchell, S.F., Walker, S.E., Algire, M.A., Park, E., Hinnebusch, A.G., and Lorsch, J.R. (2010). The 5'-7-Methylguanosine  
40 Cap on Eukaryotic mRNAs Serves Both to Stimulate Canonical Translation Initiation and to Block an Alternative  
41 Pathway. *Mol. Cell* *39*, 950–962.
- 42 Mitchell, S.F., Walker, S.E., Rajagopal, V., Aitken, C.E., and Lorsch, J.R. (2011). Recruiting knotty partners: The roles of  
43 translation initiation factors in mRNA recruitment to the eukaryotic ribosome. In *Ribosomes*. Springer Vienna, pp. 155–  
44 169.
- 45 Oberer, M., Marintchev, A., and Wagner, G. (2005). Structural basis for the enhancement of eIF4A helicase activity by  
46 eIF4G. *Genes Dev.* *19*, 2212–2223.
- 47 Palmiter, R.D. (1975). Quantitation of parameters that determine the rate of ovalbumin synthesis. *Cell* *4*, 189–197.
- 48 Park, E.-H., Walker, S.E., Zhou, F., Lee, J.M., Rajagopal, V., Lorsch, J.R., and Hinnebusch, A.G. (2013). Yeast  
49 eukaryotic initiation factor 4B (eIF4B) enhances complex assembly between eIF4A and eIF4G in vivo. *J. Biol. Chem.*  
50 *288*, 2340–2354.
- 51 Parsyan, A., Svitkin, Y., Shahbazian, D., Gkogkas, C., Lasko, P., Merrick, W.C., and Sonenberg, N. (2011). mRNA  
52 helicases: the tacticians of translational control. *Nat. Rev. Mol. Cell Biol.* *12*, 235–245.
- 53 Passmore, L.A., Schmeing, T.M., Maag, D., Applefield, D.J., Acker, M.G., Algire, M. a, Lorsch, J.R., and Ramakrishnan,  
54 V. (2007). The eukaryotic translation initiation factors eIF1 and eIF1A induce an open conformation of the 40S  
55 ribosome. *Mol. Cell* *26*, 41–50.
- 56 Paulin, F.E., Campbell, L.E., O'Brien, K., Loughlin, J., and Proud, C.G. (2001). Eukaryotic translation initiation factor 5  
57 (eIF5) acts as a classical GTPase-activator protein. *Curr. Biol.* *11*, 55–59.

- 1 Pause, A., Methot, N., and Svitkin, Y. (1994). Dominant negative mutants of mammalian translation initiation factor eIF-  
2 4A define a critical role for eIF-4F in cap-dependent and cap-independent initiation of translation. *EMBO ... 1*.
- 3 Peck, M., and Herschlag, D. (2003). Adenosine 5'-O-(3-thio)triphosphate (ATP $\gamma$ S) is a substrate for the nucleotide  
4 hydrolysis and RNA unwinding activities of eukaryotic translation initiation factor 4A. *Rna*.
- 5 Pelletier, J., and Sonenberg, N. (1985). Insertion mutagenesis to increase secondary structure within the 5' noncoding  
6 region of a eukaryotic mRNA reduces translational efficiency. *Cell* *40*, 515–526.
- 7 Pestova, T. V., and Kolupaeva, V.G. (2002). The roles of individual eukaryotic translation initiation factors in ribosomal  
8 scanning and initiation codon selection. *Genes Dev.* *16*, 2906–2922.
- 9 Pestova, T. V., Borukhov, S.I., and Hellen, C.U. (1998). Eukaryotic ribosomes require initiation factors 1 and 1A to  
10 locate initiation codons. *Nature* *394*, 854–859.
- 11 Pisareva, V.P., Pisarev, A. V., Komar, A.A., Hellen, C.U.T., and Pestova, T. V (2008). Translation initiation on  
12 mammalian mRNAs with structured 5'UTRs requires DExH-box protein DHX29. *Cell* *135*, 1237–1250.
- 13 Qu, X., Wen, J.-D., Lancaster, L., Noller, H.F., Bustamante, C., and Tinoco, I. (2011). The ribosome uses two active  
14 mechanisms to unwind messenger RNA during translation. *Nature* *475*, 118–121.
- 15 Rajagopal, V., Park, E.-H., Hinnebusch, A.G., and Lorsch, J.R. (2012). Specific Domains in Yeast Translation Initiation  
16 Factor eIF4G Strongly Bias RNA Unwinding Activity of the eIF4F Complex toward Duplexes with 5'-Overhangs. *J.*  
17 *Biol. Chem.* *287*, 20301–20312.
- 18 Ray, B.K., Lawson, T.G., Kramer, J.C., Cladaras, M.H., Grifo, J.A., Abramson, R.D., Merrick, W.C., and Thach, R.E.  
19 (1985). ATP-dependent unwinding of messenger RNA structure by eukaryotic initiation factors. *J. Biol. Chem.* *260*,  
20 7651–7658.
- 21 Rogers, G., Richter, N., and Merrick, W. (1999). Biochemical and Kinetic Characterization of the RNA Helicase Activity  
22 of Eukaryotic Initiation Factor 4A. *J. Biol. Chem.* *274*, 12236–12244.
- 23 Rogers, G.W., Lima, W.F., and Merrick, W.C. (2001). Further characterization of the helicase activity of eIF4A.  
24 Substrate specificity. *J. Biol. Chem.* *276*, 12598–12608.
- 25 Rouskin, S., Zubradt, M., Washietl, S., Kellis, M., and Weissman, J.S. (2014). Genome-wide probing of RNA structure  
26 reveals active unfolding of mRNA structures in vivo. *Nature* *505*, 701–705.
- 27 Schreier, M.H., and Staehelin, T. (1973). Translation of Rabbit Hemoglobin Messenger RNA In Vitro with Purified and  
28 Partially Purified Components from Brain or Liver of Different Species. *Proc. Natl. Acad. Sci. U. S. A.* *70*, 462–465.
- 29 Schreier, M., Erni, B., and Staehelin, T. (1977). Purification and Characterization of Seven Initiation Factors. *J. Mol. Biol.*  
30 *116*, 727–753.
- 31 Schütz, P., Bumann, M., Oberholzer, A.E., Bieniossek, C., Trachsel, H., Altmann, M., and Baumann, U. (2008). Crystal  
32 structure of the yeast eIF4A-eIF4G complex: an RNA-helicase controlled by protein-protein interactions. *Proc. Natl.*  
33 *Acad. Sci.* *105*, 9564–9569.
- 34 Seal, S.N., Schmidt, A., and Marcus, A. (1983). Eukaryotic initiation factor 4A is the component that interacts with ATP  
35 in protein chain initiation. *Proc Natl Acad Sci U S A* *80*, 6562–6565.
- 36 Sen, N.D., Zhou, F., Ingolia, N.T., and Hinnebusch, A.G. (2015). Genome-wide analysis of translational efficiency  
37 reveals distinct but overlapping functions of yeast DEAD-box RNA helicases Ded1 and eIF4A. *Genome Res.* *25*, 1196–  
38 1205.
- 39 Sen, N.D., Zhou, F., Harris, M.S., Ingolia, N.T., and Hinnebusch, A.G. (2016). eIF4B stimulates translation of long  
40 mRNAs with structured 5' UTRs and low closed-loop potential but weak dependence on eIF4G. *Proc. Natl. Acad. Sci.*  
41 *201612398*.
- 42 Shah, P., Ding, Y., Niemczyk, M., Kudla, G., and Plotkin, J.B. (2013). Rate-limiting steps in yeast protein translation. *Cell*  
43 *153*, 1589–1601.
- 44 Simonetti, A., Querido, J.B., Myasnikov, A.G., Mancera-Martinez, E., Renaud, A., Kuhn, L., and Hashem, Y. (2016).  
45 eIF3 Peripheral Subunits Rearrangement after mRNA Binding and Start-Codon Recognition. *Mol. Cell* *63*, 206–217.
- 46 Siwiak, M., and Zielenkiewicz, P. (2010). A comprehensive, quantitative, and genome-wide model of translation. *PLoS*  
47 *Comput. Biol.* *6*, 15.
- 48 Sobczak, K., Michlewski, G., De Mezer, M., Kierzek, E., Krol, J., Olejniczak, M., Kierzek, R., and Krzyzosiak, W.J.  
49 (2010). Structural diversity of triplet repeat RNAs. *J. Biol. Chem.* *285*, 12755–12764.
- 50 Sokabe, M., and Fraser, C.S. (2017). A helicase-independent activity of eIF4A in promoting mRNA recruitment to the  
51 human ribosome. *Proc. Natl. Acad. Sci.* *114*, 6304–6309.
- 52 Spirin, A.S. (2009). How does a scanning ribosomal particle move along the 5'-untranslated region of eukaryotic mRNA?  
53 Brownian Ratchet model. *Biochemistry* *48*, 10688–10692.
- 54 Svitkin, Y.Y. V, Pause, A., Haghghat, A., Pyronnet, S., Witherell, G., Belsham, G.J., and Sonenberg, N. (2001). The  
55 requirement for eukaryotic initiation factor 4A (eIF4A) in translation is in direct proportion to the degree of mRNA 5'  
56 secondary structure. *RNA* *7*, 382–394.
- 57 Takyar, S., Hickerson, R.P., and Noller, H.F. (2005). mRNA helicase activity of the ribosome. *Cell* *120*, 49–58.

- 1 Valásek, L.S. (2012). “Ribozomin” – translation initiation from the perspective of the ribosome-bound eukaryotic  
2 initiation factors (eIFs). *Curr. Protein Pept. Sci.* *13*, 305–330.
- 3 Walker, S.E., and Fredrick, K. (2008). Preparation and evaluation of acylated tRNAs. *Methods* *44*, 81–86.
- 4 Walker, S.E., Zhou, F., Mitchell, S.F., Larson, V.S., Valasek, L., Hinnebusch, A.G., and Lorsch, J.R. (2013). Yeast eIF4B  
5 binds to the head of the 40S ribosomal subunit and promotes mRNA recruitment through its N-terminal and internal  
6 repeat domains. *RNA* *19*, 191–207.
- 7 Yoder-Hill, J., Pause, A., Sonenberg, N., and Merrick, W.C. (1993). The p46 subunit of eukaryotic initiation factor (eIF)-  
8 4F exchanges with eIF-4A. *J. Biol. Chem.* *268*, 5566–5573.
- 9 Yu, Y., Abaeva, I.S., Marintchev, A., Pestova, T. V., and Hellen, C.U.T. (2011). Common conformational changes  
10 induced in type 2 picornavirus IRESs by cognate trans-acting factors. *Nucleic Acids Res.* *39*, 4851–4865.
- 11 Zeng, Y., and Cullen, B.R. (2004). Structural requirements for pre-microRNA binding and nuclear export by Exportin 5.  
12 *Nucleic Acids Res.* *32*, 4776–4785.
- 13 Zuker, M. (2003). Mfold web server for nucleic acid folding and hybridization prediction. *Nucleic Acids Res.* *31*, 3406–  
14 3415.  
15



## SUPPLEMENTARY METHODS

### RNAs used in the study:

RNA 1 was transcribed using the T7 RNA Polymerase and a DNA template while RNAs 2-10 were transcribed from a plasmid digested with a restriction nuclease at the 3'-end of the desired DNA template (i.e. run-off transcription) exactly as described previously (Acker et al., 2007).

| RNA | DNA Template name | DNA Template Sequence (5'-3')<br>complementary "clamp" DNA oligomer<br>annealed to the region in bold | Resulting T7 transcribed<br>RNA sequence (5'-3')<br>purified by denaturing<br>acrylamide gel<br>electrophoresis |
|-----|-------------------|-------------------------------------------------------------------------------------------------------|-----------------------------------------------------------------------------------------------------------------|
| 1   | midAUG<br>23      | TCGACTTTGTTGTTGTTGTTGTTCC<br>ATTTGTTGTTGTTGTTGTTGTTGCC<br><b>TATAGTGAGTCGTATTACATATGC</b><br>GTGTTACC | GGCAACAACAACAACA<br>CAACAA <u>AUG</u> GAACAACA<br>ACAACAACAAGUCGA                                               |

| RNA | Plasmid name | Cloning Vector        | Digested for T7 Polymerase run-off transcription | Resulting RNA sequence (5'-3') made by T7 RNA Polymerase run-off transcription and purified by denaturing acrylamide gel electrophoresis                                                                                                                  |
|-----|--------------|-----------------------|--------------------------------------------------|-----------------------------------------------------------------------------------------------------------------------------------------------------------------------------------------------------------------------------------------------------------|
| 2   | SL25-0       | pBluescript II KS (+) | SalI-HF                                          | GGAAAGAAUUCACUUAAGCAACAAA <u>AUGG</u><br>AAACAACAACAACAACAACAACAACA<br>GUCAACAACAACAACAACAACAACA<br>ACAACAACAACAACAACAACAACA<br>CAACAACAACAACAACAACAACAACA<br>AAACAACAACAACAACAACAACAACA<br>ACAACAACAACAACAACAACAACA<br>CAACAACAACAACAACAACAACAACA<br>AAG |
| 3   | SL150-0      | pBluescript II KS (+) | SalI-HF                                          | GGAAAGAAUUCACAACAACAACAACA<br>CAACAACAACAACAACAACAACAACA<br>AACAACAACUUAAGCAACAACAACA<br>AACAACAACAACAACAACAACAACA<br>AACAACAACAACAACAACAACAACA<br><u>GGAAACAACAACAACAACAACAACA</u><br>CUAGUCAACAACAACAACAACAACA<br>ACAACAACAACAACAACAACAACA<br>CAAAG     |
| 4   | CAA617       | pUC57                 | SspI-HF                                          | GGAACAACAACAACAACAACAACA<br>ACAACAACAACAACAACAACAACA<br>CAAAAA <u>AUG</u> AGAGAACAACAACAACA<br>CAACAACAACAACAACAACAACAACA<br>ACAACAACAACAACAACAACAACA<br>ACAACAACAACAACAACAACAACA<br>CAACAACAACAACAACAACAACAACA<br>AACAACAACAACAACAACAACAACA<br>AAU       |

| RNA | Plasmid name | Cloning Vector        | Digested for T7 Polymerase run-off transcription | Resulting RNA sequence (5'-3') made by T7 RNA Polymerase run-off transcription and purified by denaturing acrylamide gel electrophoresis                                                                                                                                                                                                                                                                                          |
|-----|--------------|-----------------------|--------------------------------------------------|-----------------------------------------------------------------------------------------------------------------------------------------------------------------------------------------------------------------------------------------------------------------------------------------------------------------------------------------------------------------------------------------------------------------------------------|
| 5   | CAA663       | pUC57                 | SspI-HF                                          | GGAAAGAAUUGCCAUCUUGGCAAUUCAAC<br>AACAAACAACAACAACAACAACAACAACA<br>ACAACAACAACAACAACAACAACAACA<br>ACAACAACAACAACAACAACAACAACA<br>CAACAACAACAACAACAACAACAACAAC<br>AACAAACAACAACAACAACAACAACAACA<br>ACAACAACAACAACAACAACAACAACA<br>CAACAACAACAACAACAACAACAACAAC<br>AACAAACAACAACAACAACAACAACA<br>AACAAACAACAACAACAACAACAACA                                                                                                          |
| 6   | CAA659       | pUC57                 | SspI-HF                                          | GGAAACAACAACAACAACAACAACAACA<br>AACAAACAACAACAAGAAUUGCCAUCUUGGC<br>AAUUCCAAACAACAACAACAACAACAACA<br>AACAAACAACAACAACAACAACAACAACA<br>ACAACAACAACAACAACAACAACAACA<br>CAACAACAACAACAACAACAACAACAACA<br>AACAAACAACAACAACAACAACAACAACA<br>ACAACAACAACAACAACAACAACAACA<br>CAACAACAACAACAACAACAACAACA<br>CAACAACAACAACAACAACAACAACA                                                                                                     |
| 7   | FJZ617       | pBluescript II KS (+) | SalI-HF                                          | GGAAAGAAUUCAACAACAACAACAACAACA<br>ACAACAACAACAACAACAACAACAACA<br>CAAAAAAUGAGAGCCAAGUGGAGAAAGAA<br>GAGAACUAGAAGACUUAAGAGAAAGAGAC<br>GGAAGGUGAGAGCCAGAUCCAAAUAAGCG<br>GAUUAUGAGUAAAUAACUCUAAUUUUUGUU<br>UUAAAUUCUUUCAAGAGUAUCGUAUAUGUC<br>AUUGAUGAAUUAACAUGUUAGUUUCUAAU<br>CUACCUCUAAUUGGAUCUAAAUUGCAUACU<br>AAUCUCACGGUGGGGUGUAAACCAUUGCC<br>UACUAAUUUUAUAGUGCUUUUAUAUAUGUC<br>UCACUAGUUUAUAUCAUUGUCCGUUUUU<br>UUGG                |
| 8   | FJZ663       | pBluescript II KS (+) | SalI-HF                                          | GGAAAGAAUUGCCAUCUUGGCAAUUCAAC<br>AACAAACAACAACAACAACAACAACAACA<br>ACAACAACAACAACAACAACAACAACA<br>CAAGUGGAGAAAGAAGAGAACUAGAAGAC<br>UUAAGAGAAAGAGACGGAAGGUGAGAGCC<br>AGAUCCAAAUAAAGCGGAUUAUGAGUAAAU<br>AACUCUAAUUUUUGUUUUAAAUCUUUCA<br>GAGUAUCGUAUAUGUCAUUGAUGAAUUAAC<br>AUGUUAGUUUCUUAUCUACCUCUAAUUGG<br>AUCUAAAUAUGCAUACUAAUCUCACGGUGG<br>GGUGUAAACCAUUGCCUACUAAUUAUAUA<br>GUGCUUUUAUAUAUGUCUCACUAGUUUAA<br>UCAAUUGUCCGUUUUUUUUGG |





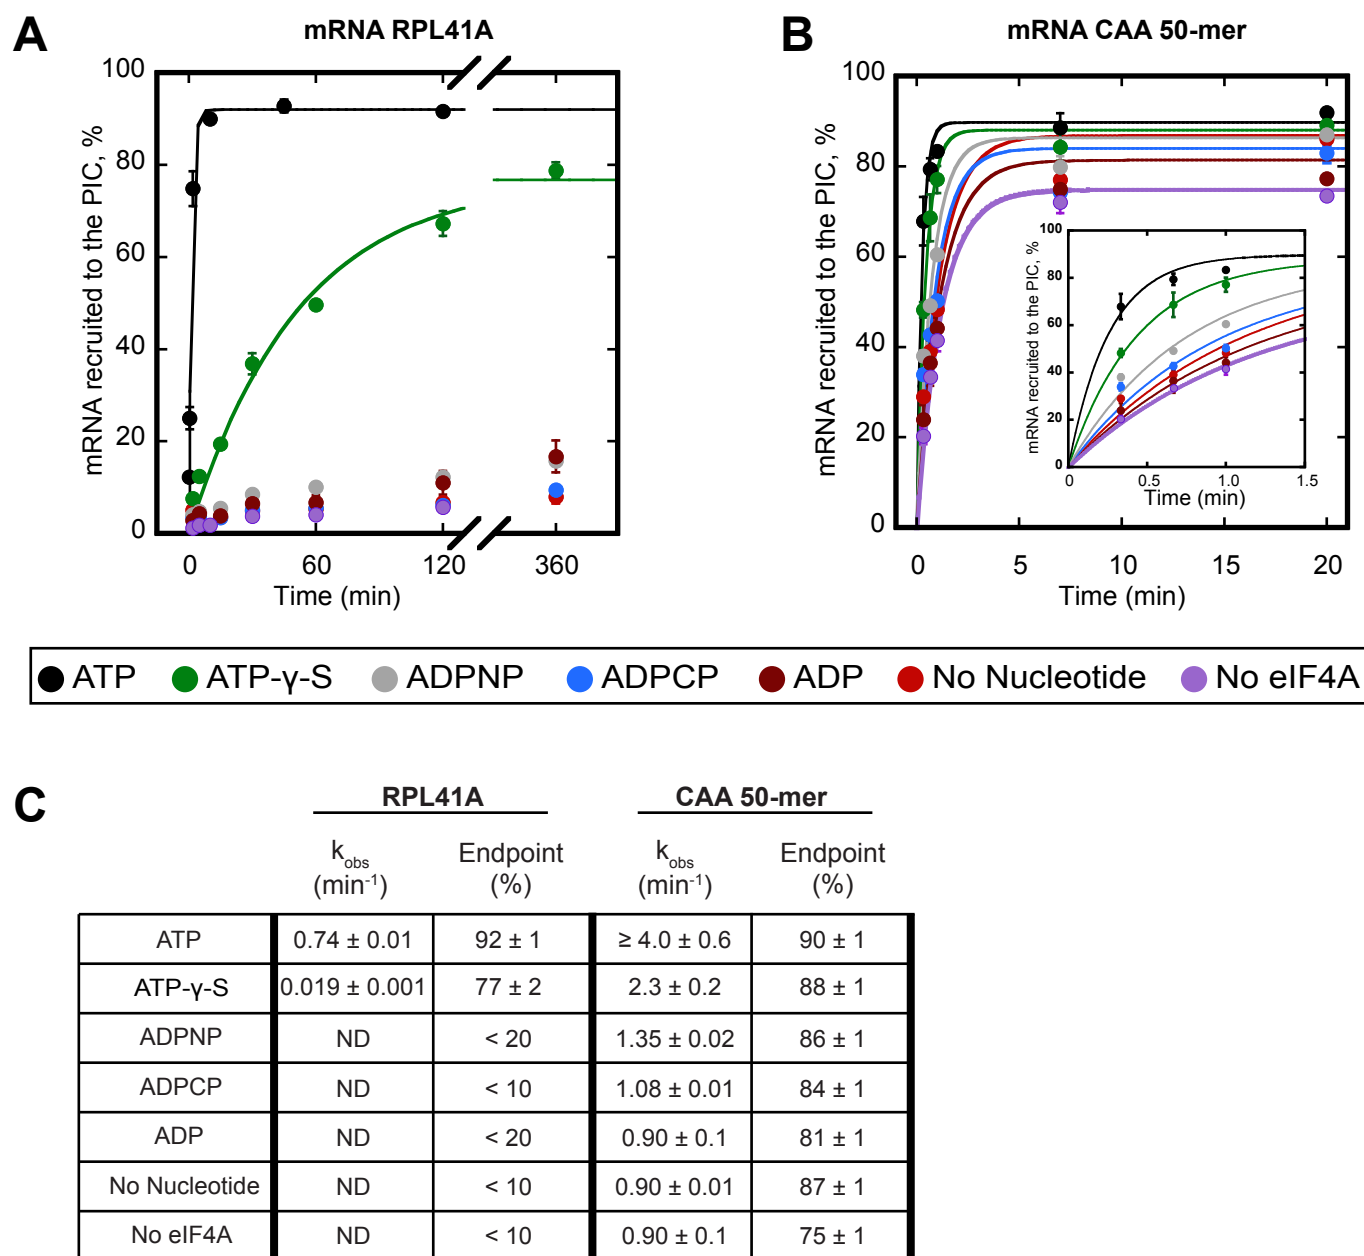

Figure 1

**Figure 1.** ATP hydrolysis by eIF4A stimulates recruitment of natural mRNA *RPL41A* as well as a synthetic 50-mer made up largely of CAA-repeats, presumed to be unstructured, with an AUG start codon 23 nucleotides from the 5'-end (CAA 50-mer). The concentration of ATP and analogs was 2 mM. **(A)** Percentage of *RPL41A* recruited to the PIC versus time. **(B)** Percentage of CAA 50-mer recruited to the PIC versus time. The larger plot shows the time-course up to 20 min. The inset shows the first 1.5 minutes for clarity. With the CAA 50-mer in the presence of ATP and eIF4A, reaction rates are at the limit of our ability to measure by hand but the results provide an estimate of the value. **(C)** Observed rate constants ( $k_{\text{obs}}$ ) and reaction endpoints from the data in panels A and B. All data in the figure are mean values ( $n \geq 2$ ) and error bars represent average deviation of the mean. With *RPL41A*, rates with ADPNP, ADPCP, ADP, no nucleotide, and no eIF4A could not be measured accurately due to low endpoints (“ND”).

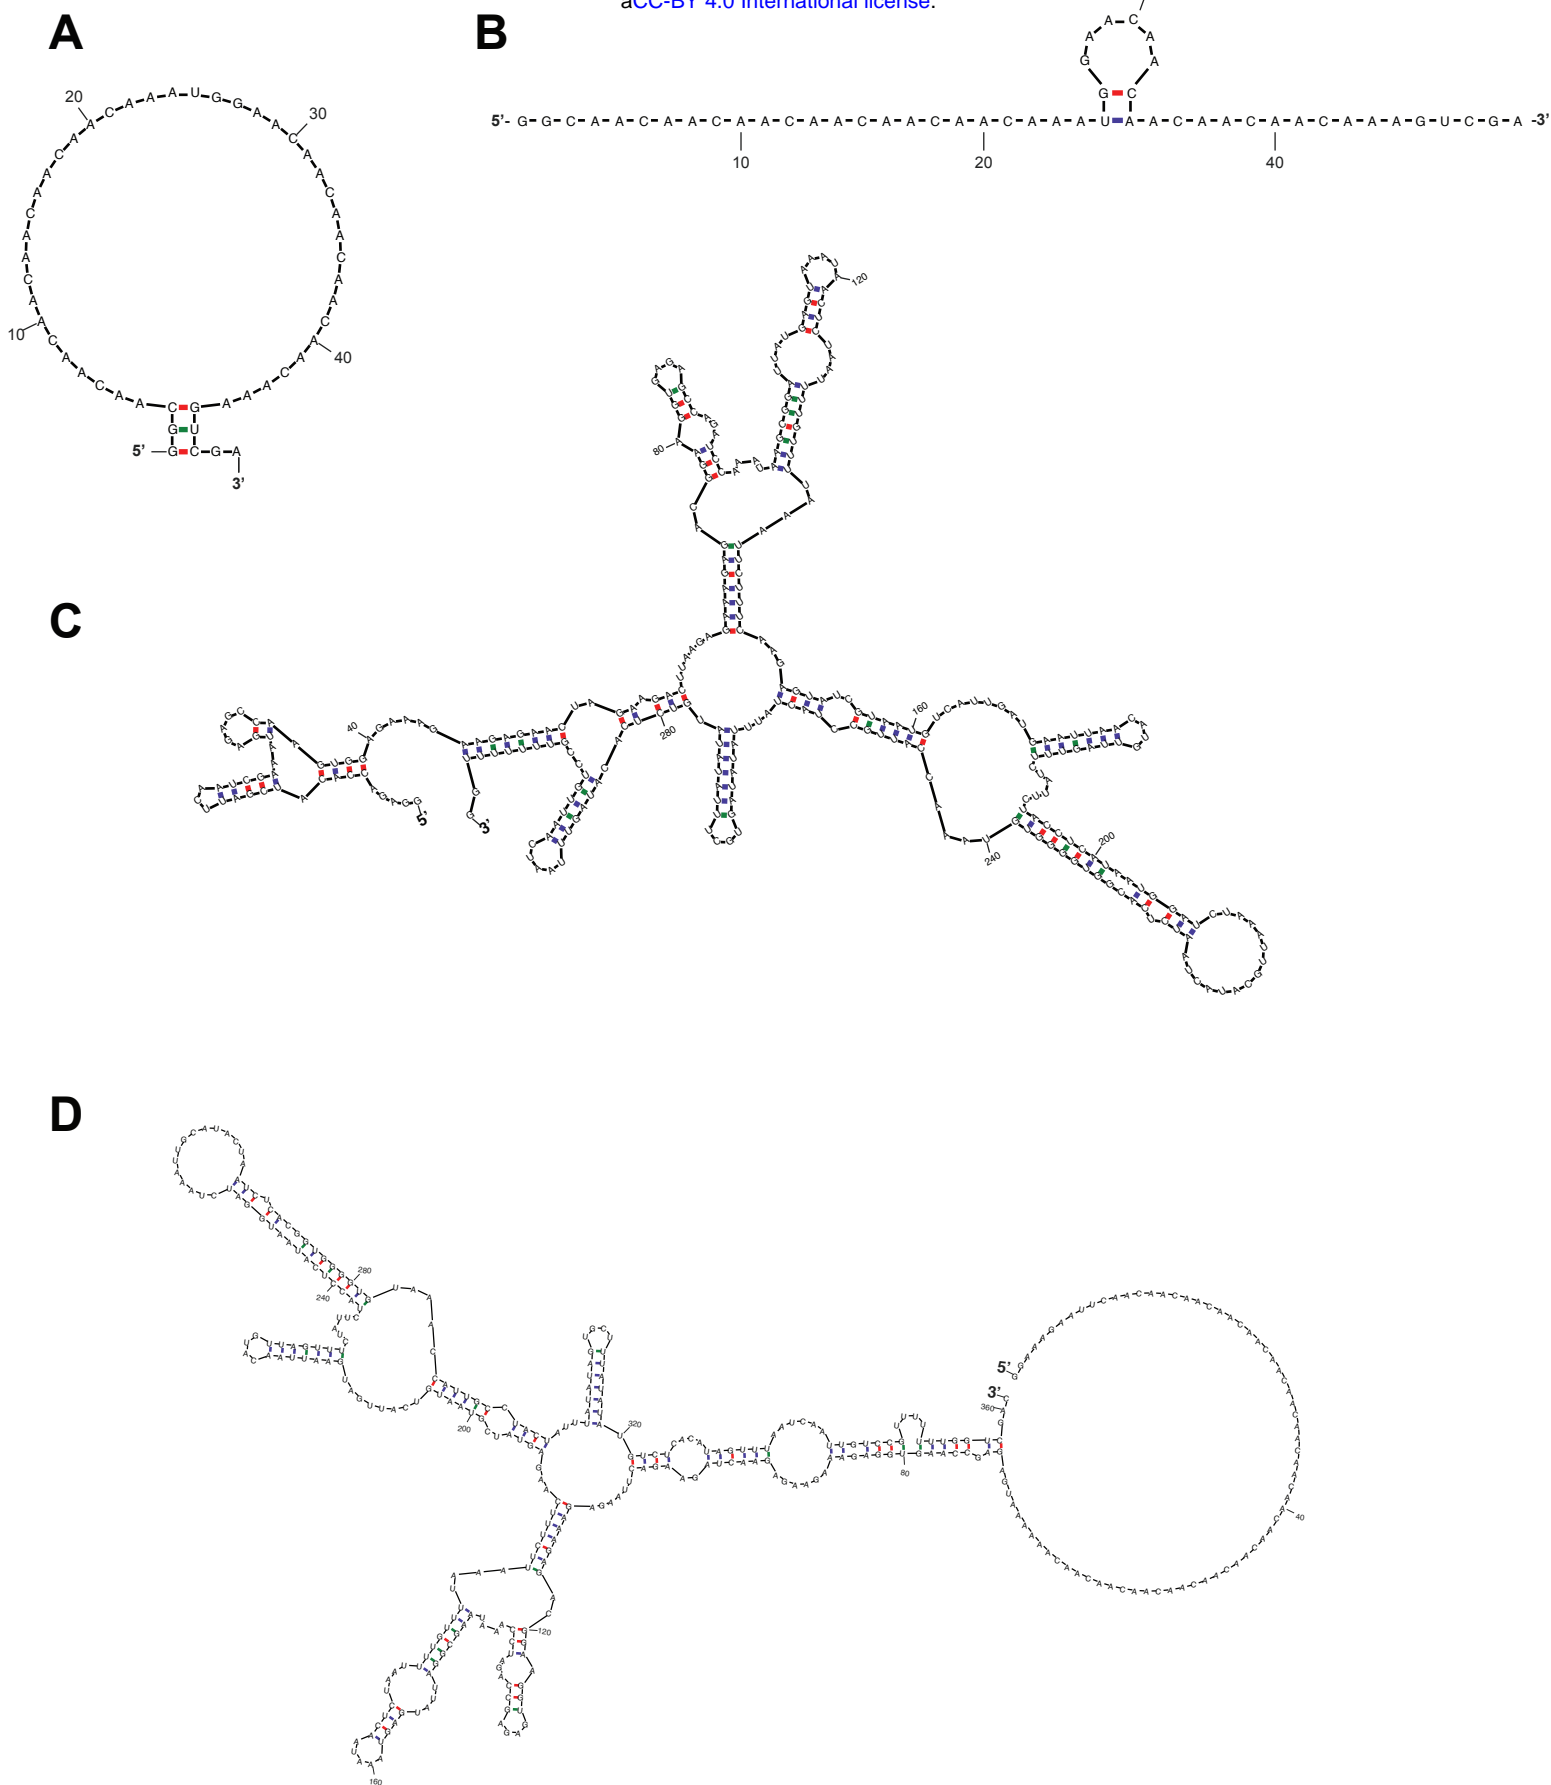

Figure 1 - Figure Supplement 1

**Figure 1 – Figure supplement 1.** RPL41A can form structural elements throughout its length whereas the CAA 50-mer has a low propensity to form structures. RNA folds, predicted by mfold (Zuker, 2003), that are representative of the population of conformations adopted by (A-B) CAA 50-mer; (C) *RPL41A*; (D) chimeric RNA with CAA repeat 5'-UTR and RPL41A sequence 3' of the AUG codon (RNA 7; Figure 3A).

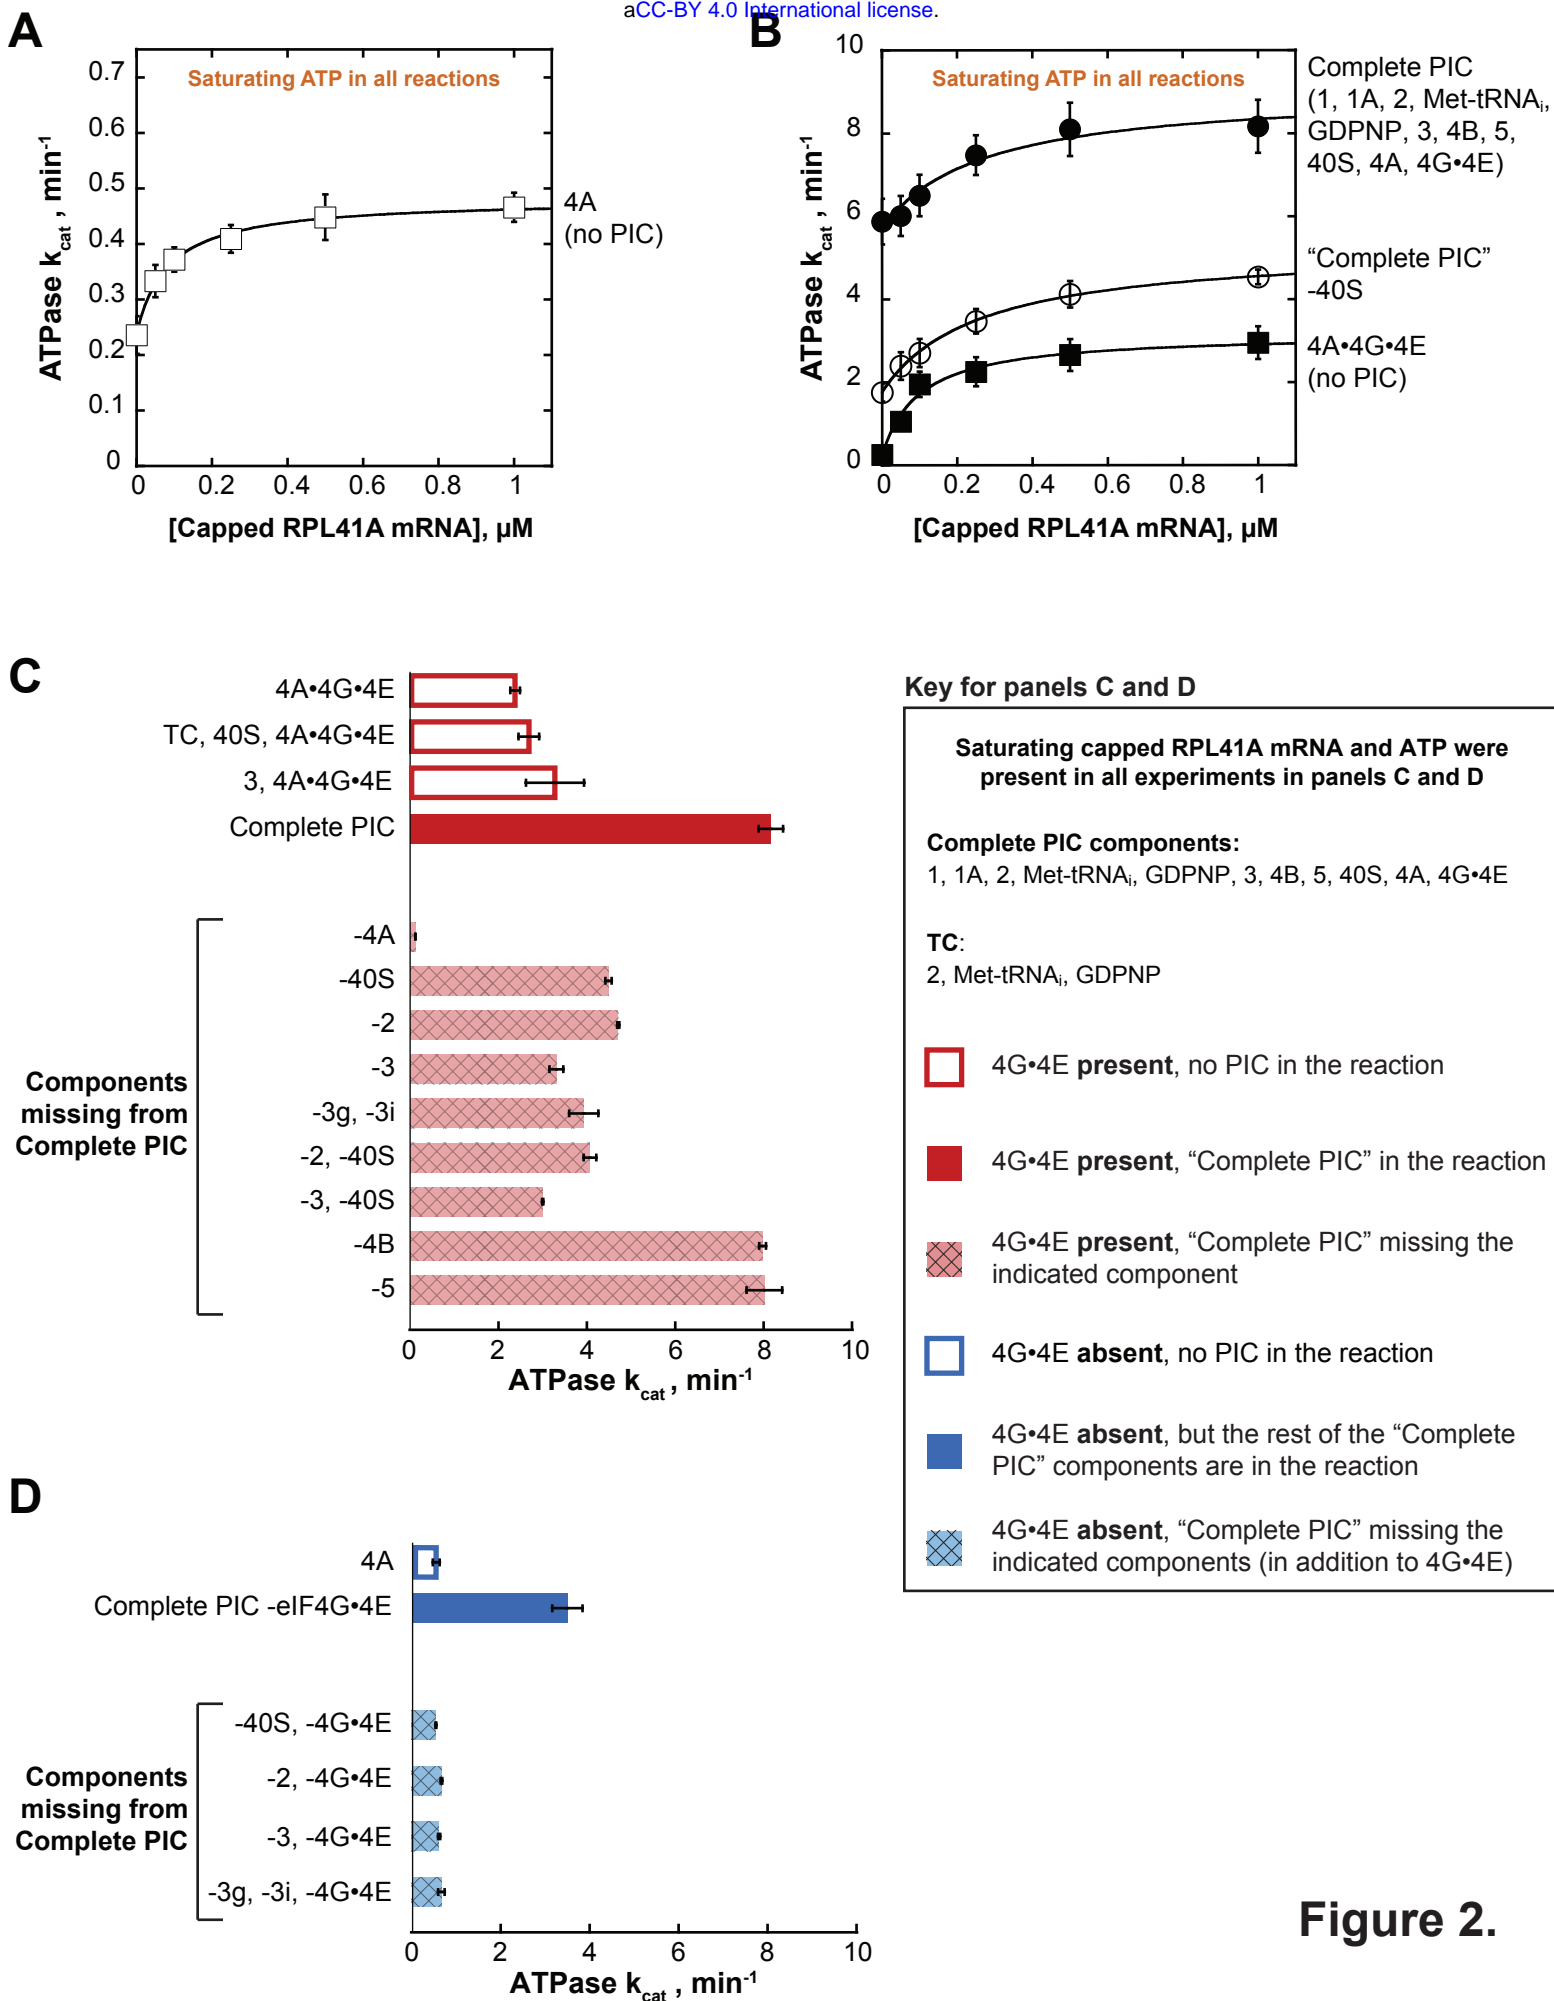

**Figure 2.**

**Figure 2.** eIF4A and eIF4A•4G•4E ATPase activities are stimulated by the PIC. ATPase activity of 5  $\mu\text{M}$  eIF4A in the presence of saturating (5 mM) ATP•Mg<sup>2+</sup> as a function of the concentration of capped *RPL41A* mRNA for **(A)** eIF4A (no PIC):  $k_{\text{cat}} = 0.48 \pm 0.04 \text{ min}^{-1}$ ,  $K_m^{\text{RNA}} = 80 \mu\text{M}$ ; **(B)** Solid black circles: Complete PIC (contains 5  $\mu\text{M}$  eIF4A, 0.5  $\mu\text{M}$  eIF4G•4E, 0.5  $\mu\text{M}$  eIF4B, 0.5  $\mu\text{M}$  eIF2, 0.5  $\mu\text{M}$  Met-tRNA<sub>i</sub>, 1 mM GDPNP•Mg<sup>2+</sup>, 0.5  $\mu\text{M}$  eIF3, 0.5  $\mu\text{M}$  eIF5, 1  $\mu\text{M}$  eIF1, 1  $\mu\text{M}$  eIF1A, and 0.5  $\mu\text{M}$  40S subunits):  $k_{\text{cat}} = 9.0 \pm 0.8 \text{ min}^{-1}$ ,  $K_m^{\text{RNA}} = 260 \pm 40 \mu\text{M}$ . White circles: "Complete PIC-40S" (contains all "Complete PIC" components except the 40S subunit):  $k_{\text{cat}} = 5.3 \pm 0.1 \text{ min}^{-1}$ ,  $K_m^{\text{RNA}} = 270 \pm 70 \mu\text{M}$ . Solid black squares: 4A•4G•4E alone (no PIC) (contains 5  $\mu\text{M}$  eIF4A and 0.5  $\mu\text{M}$  eIF4G•4E only):  $k_{\text{cat}} = 3.2 \pm 0.2 \text{ min}^{-1}$ ,  $K_m^{\text{RNA}} = 100 \pm 10 \mu\text{M}$ . **(C)**  $k_{\text{cat}}$  values for ATP hydrolysis from the experiments described in (A) and (B) plus additional drop-out experiments. In all cases, saturating (0.5  $\mu\text{M}$ ) capped *RPL41A* mRNA was present. The components present in the reactions, indicated to the left of each bar, were at the same concentrations as in (B). **(D)** ATPase activity of 5  $\mu\text{M}$  eIF4A alone or in the presence of a PIC missing eIF4G•4E as well as other components, as indicated to the left of each bar, all measured in the presence of saturating (0.5  $\mu\text{M}$ ) capped *RPL41A* mRNA. The concentrations of all components, when present, were the same as in (B). All data presented in the figure are mean values ( $n \geq 2$ ) and error bars represent average deviation of the mean.



**A**

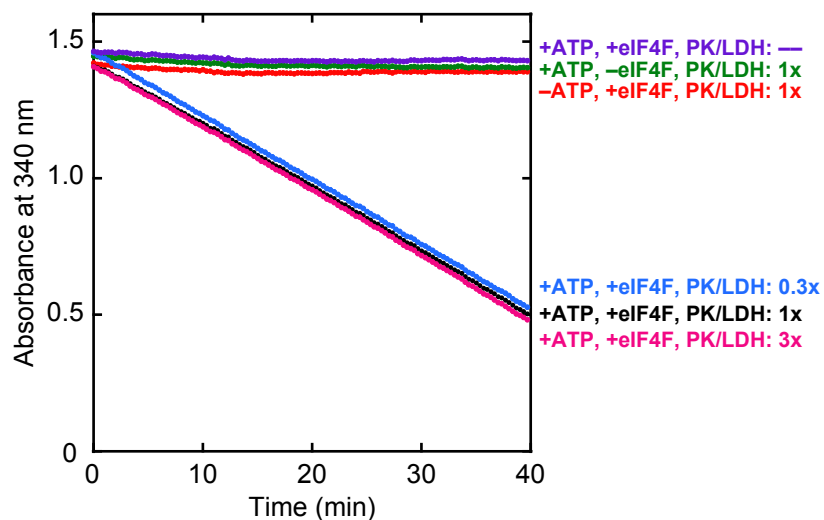

**B**

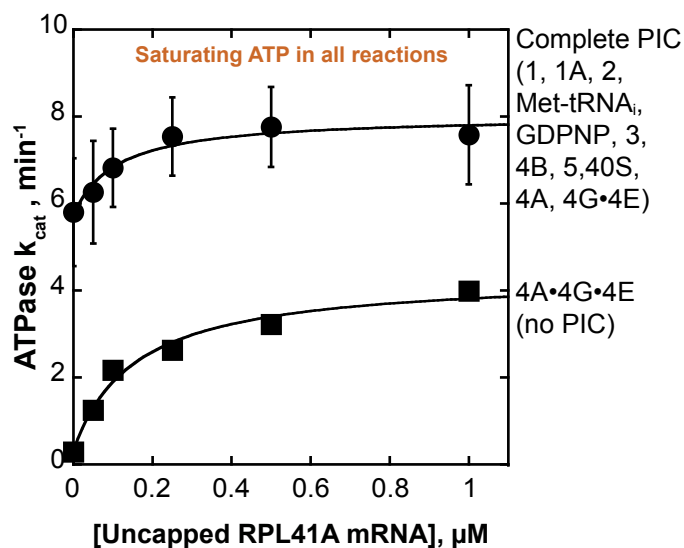

**C**

All values in the table were measured with saturating RPL41A mRNA

|                                      | ATPase $k_{cat}$ , $\text{min}^{-1}$ | $K_m^{\text{ATP}}$ , $\mu\text{M}$ |              |
|--------------------------------------|--------------------------------------|------------------------------------|--------------|
| 4A•4G•4E                             | $2.4 \pm 0.1$                        | $250 \pm 10$                       |              |
| TC, 40S, 4A•4G•4E                    | $2.7 \pm 0.2$                        | $280 \pm 40$                       |              |
| 3, 4A•4G•4E                          | $3.2 \pm 0.7$                        | $200 \pm 40$                       |              |
| <b>Complete PIC</b>                  | <b><math>8.2 \pm 0.3</math></b>      | <b><math>330 \pm 20</math></b>     |              |
| Components missing from Complete PIC | -4A                                  | $\sim 0.10 \pm 0.01$               | ND           |
|                                      | -40S                                 | $4.5 \pm 0.1$                      | $150 \pm 1$  |
|                                      | -2                                   | $4.7 \pm 0.1$                      | $210 \pm 5$  |
|                                      | -3                                   | $3.3 \pm 0.2$                      | $180 \pm 20$ |
|                                      | -3g, -3i                             | $3.9 \pm 0.3$                      | $170 \pm 10$ |
|                                      | -2, -40S                             | $4.1 \pm 0.1$                      | $150 \pm 1$  |
|                                      | -3, -40S                             | $3.0 \pm 0.1$                      | $150 \pm 1$  |
|                                      | -4B                                  | $8.0 \pm 0.1$                      | $480 \pm 10$ |
|                                      | -5                                   | $8.0 \pm 0.4$                      | $350 \pm 10$ |

**D**

All values in the table were measured with saturating RPL41A mRNA

|                                      | ATPase $k_{cat}$ , $\text{min}^{-1}$ | $K_m^{\text{ATP}}$ , $\mu\text{M}$ |                |
|--------------------------------------|--------------------------------------|------------------------------------|----------------|
| 4A                                   | $0.58 \pm 0.08$                      | $2500 \pm 400$                     |                |
| <b>Complete PIC -eIF4G•4E</b>        | <b><math>3.5 \pm 0.3</math></b>      | <b><math>1600 \pm 200</math></b>   |                |
| Components missing from Complete PIC | -40S, -4G•4E                         | $0.55 \pm 0.01$                    | $1800 \pm 100$ |
|                                      | -2, -4G•4E                           | $0.67 \pm 0.02$                    | $1900 \pm 400$ |
|                                      | -3, -4G•4E                           | $0.62 \pm 0.02$                    | $1600 \pm 300$ |
|                                      | -3g, -3i, -4G•4E                     | $0.67 \pm 0.07$                    | $1500 \pm 300$ |

Figure 2 – figure supplement 1.

**Figure 2 – Figure supplement 1.** Control and data tables for the ATPase experiments. **(A)**

Controls for NADH enzyme-coupled microplate ATPase assay. The decrease in absorbance of 340 nm light was dependent on the presence of ATPase activity (5  $\mu\text{M}$  eIF4A, 0.5  $\mu\text{M}$  eIF4G•4E, together referred to as eIF4A•4G•4E or eIF4F), ATP•Mg<sup>2+</sup>, and a pyruvate kinase (900-1400 units/mL)/lactate dehydrogenase (600-1000 units/mL) mixture from rabbit muscle used as a 250x stock solution. **(B)** ATPase activity as a function of uncapped *RPL41A* mRNA. Solid, black squares: eIF4A•4G•4E (no PIC), as in Figure 2B ( $k_{\text{cat}}$  of  $4.3 \pm 0.1 \text{ min}^{-1}$  and  $K_m^{\text{RNA}}$  of  $150 \pm 20 \mu\text{M}$ ). Solid black circles: "Complete PIC," as in Figure 2B ( $k_{\text{cat}}$  of  $8 \pm 1 \text{ min}^{-1}$  and  $K_m^{\text{RNA}}$  of  $120 \pm 40 \mu\text{M}$ ). **(C-D)** Summary of all  $k_{\text{cat}}$  and  $K_m^{\text{ATP}}$  values in the presence of eIF4G•4E (panel C, red) and absence of eIF4G•4E (panel D, blue). Data in B-D are mean values ( $n \geq 2$ ) and error is reported as average deviation of the mean.

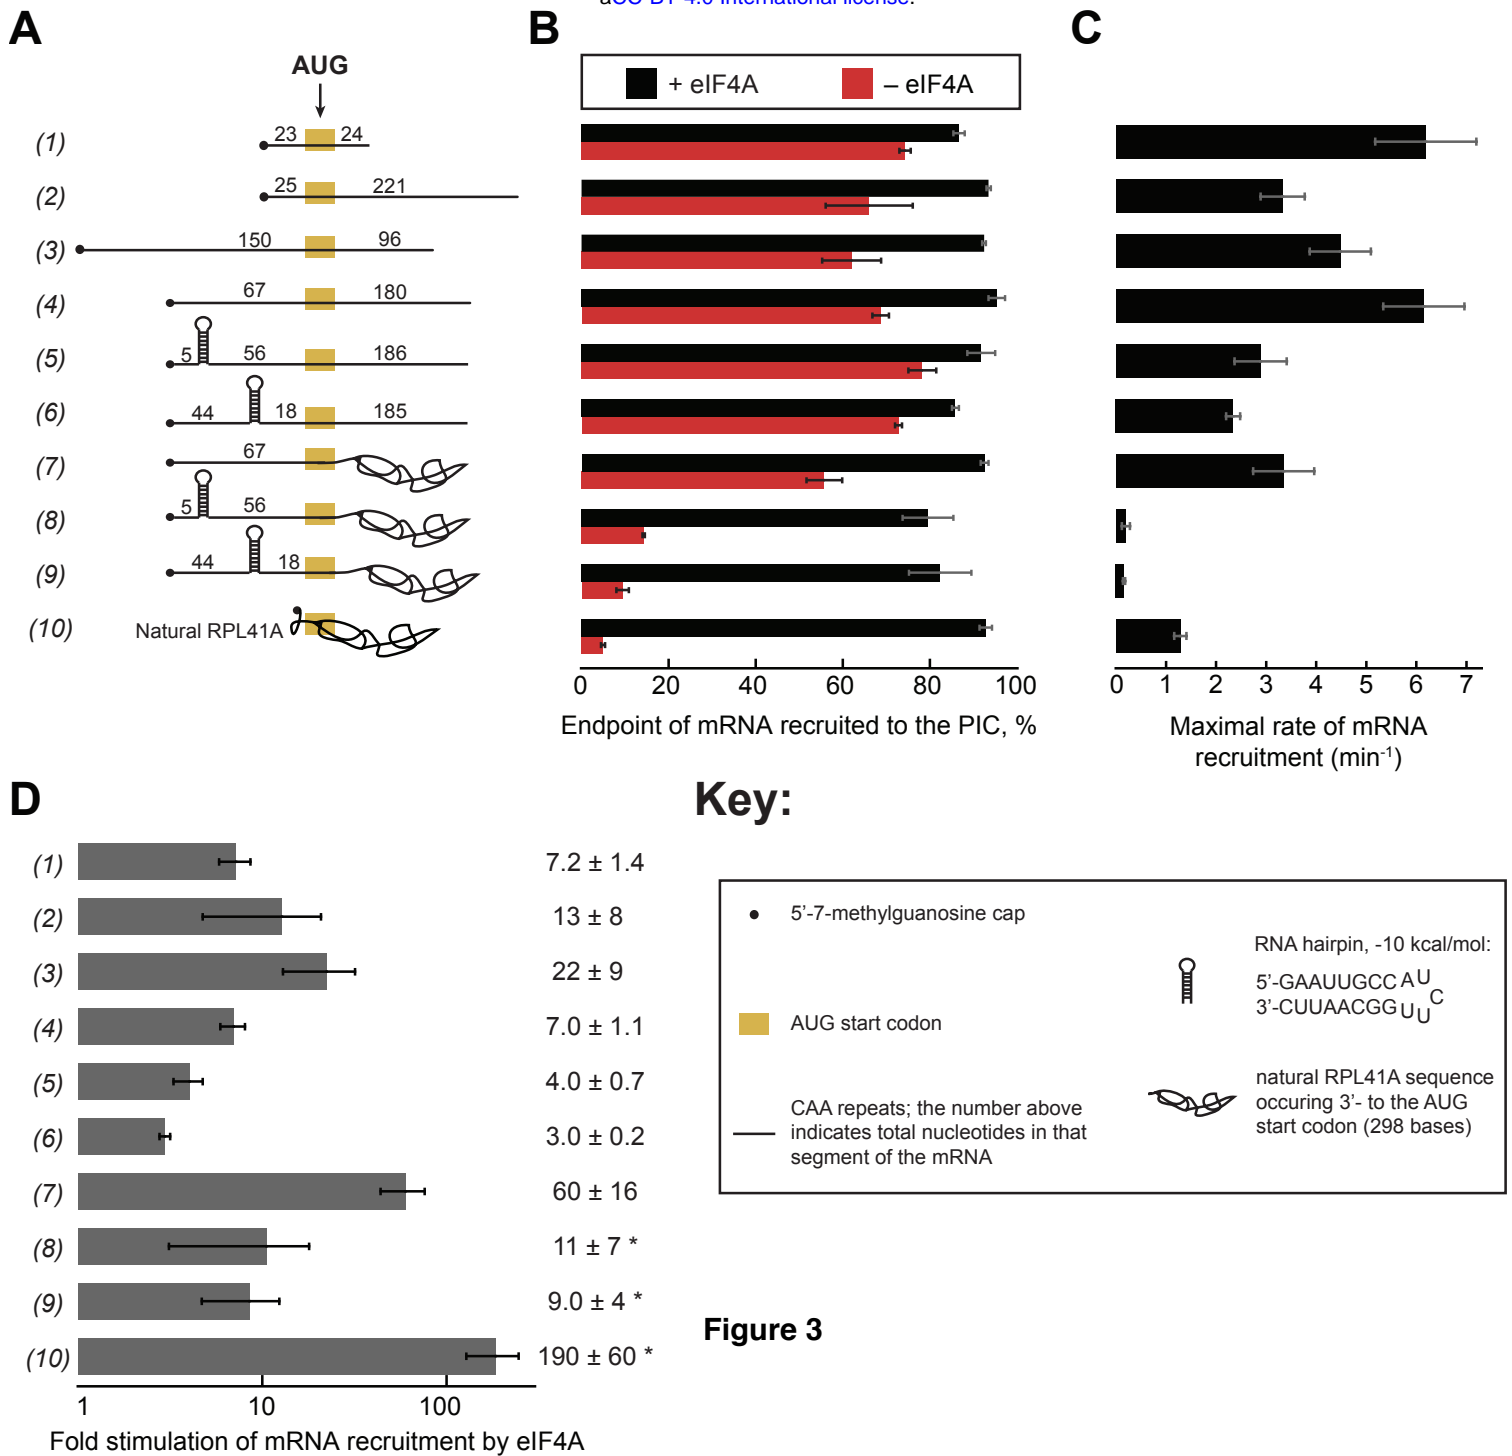

**Figure 3**

**Figure 3.** eIF4A stimulates recruitment of mRNAs regardless of their degree of structure. **(A)** Schematic of mRNAs used in the study. mRNAs were capped unless otherwise noted but do not contain a poly(A) tail. Numbers on the mRNA indicate the total number of nucleotides in the corresponding segment of the RNA. **(B)** Endpoints of recruitment to the PIC for mRNAs in (A) in the presence (black) or absence (red) of saturating (5  $\mu$ M) eIF4A. mRNAs are listed in the same order as in (A.) **(C)** Maximal rates of mRNA recruitment,  $k_{\max}$  ( $\text{min}^{-1}$ ), measured for the mRNAs in (A) (the corresponding time courses are shown in Figure 3 – figure supplement 1B-D) listed in the same order as in (A). **(D)** eIF4A-dependent stimulation of mRNA recruitment: the maximal rate of mRNA recruitment at saturating eIF4A concentration divided by the observed rate in the absence of eIF4A (calculated from data in Figure 3 – figure supplement 1E). Numbers to the left correspond to the mRNAs in (A). The asterisk (\*) indicates that due to low recruitment endpoints in the absence of eIF4A, data for mRNAs 8-10 could not be fit with an exponential rate equation and thus the fold stimulation by eIF4A was estimated from comparison of initial rates in the presence of saturating eIF4A versus the absence of eIF4A. All data presented in the figure are mean values ( $n \geq 2$ ) and error bars represent average deviation of the mean.

**A**

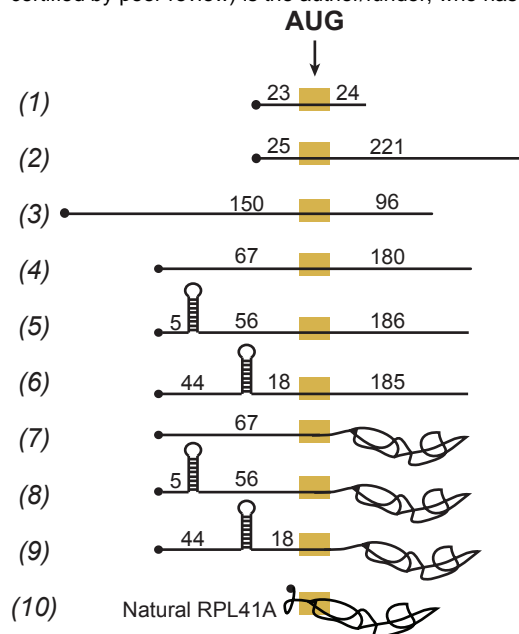

**B**

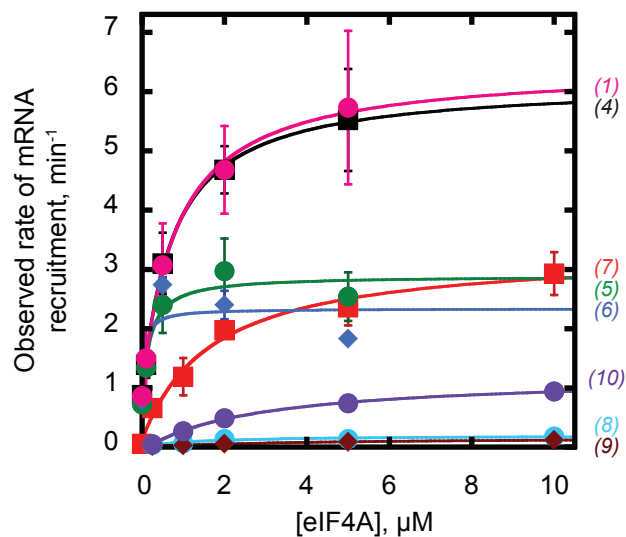

**C**

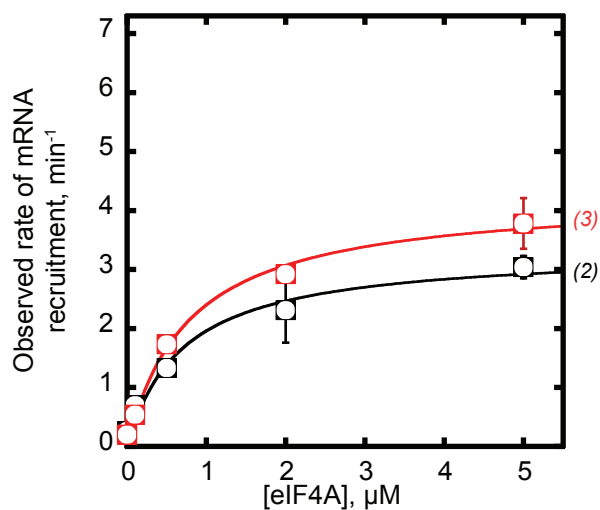

**D**

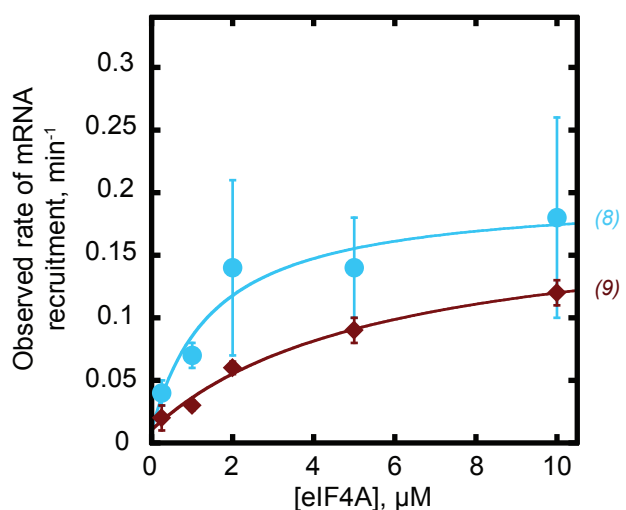

**E**

|      | $k_{\text{obs}}^{\text{no eIF4A}}$<br>( $\text{min}^{-1}$ ) | $k_{\text{max}}$<br>( $\text{min}^{-1}$ ) | $K_{1/2}^{\text{eIF4A}}$<br>( $\mu\text{M}$ ) |
|------|-------------------------------------------------------------|-------------------------------------------|-----------------------------------------------|
| (1)  | $0.90 \pm 0.1$                                              | $6.2 \pm 1.0$                             | $0.70 \pm 0.2$                                |
| (2)  | $0.26 \pm 0.16$                                             | $3.3 \pm 0.4$                             | $0.70 \pm 0.03$                               |
| (3)  | $0.20 \pm 0.08$                                             | $4.5 \pm 0.6$                             | $1.0 \pm 0.3$                                 |
| (4)  | $0.88 \pm 0.07$                                             | $6.2 \pm 0.8$                             | $0.70 \pm 0.01$                               |
| (5)  | $0.72 \pm 0.02$                                             | $2.9 \pm 0.5$                             | $0.20 \pm 0.01$                               |
| (6)  | $0.79 \pm 0.02$                                             | $2.3 \pm 0.1$                             | $0.10 \pm 0.02$                               |
| (7)  | $0.06 \pm 0.01$                                             | $3.4 \pm 0.6$                             | $1.8 \pm 0.9$                                 |
| (8)  | ND                                                          | $0.20 \pm 0.08$                           | $1.2 \pm 0.2$                                 |
| (9)  | ND                                                          | $0.16 \pm 0.02$                           | $3.5 \pm 0.8$                                 |
| (10) | ND                                                          | $1.3 \pm 0.1$                             | $3.7 \pm 1.0$                                 |

Figure 3 – figure supplement 1.

**Figure 3 – Figure supplement 1.** eIF4A promotes recruitment of both structured and CAA-repeats mRNAs. **(A)** RNAs used in the study (same as (A) in Figure 3, shown again here for convenience). **(B-C)** Observed rates ( $k_{\text{obs}}$ )  $\text{min}^{-1}$  of mRNA recruitment as a function of the concentration of eIF4A. Data were fit with a hyperbolic equation allowing for a y-intercept  $> 0$  (see Methods). Numbers in parentheses, to the right of the coordinate plane, correspond to mRNAs in (A) and are colored for easier visualization of distinct curves. RNAs 2 and 3 are shown separately for clarity. **(D)** Expansion of plots for mRNAs 8 and 9 from (B) for clarity. **(E)** The observed rate of recruitment in the absence of eIF4A ( $k_{\text{obs}}^{\text{no eIF4A}}$ ), the maximal rate of recruitment with saturating eIF4A ( $k_{\text{max}}$ ), and the concentration of eIF4A required to achieve the half-maximal rate of recruitment ( $K_{1/2}^{\text{eIF4A}}$ ) from fits in panels B-D. “ND:” the observed rate from an exponential fit could not be determined because of low reaction endpoint. All data presented in the figure are mean values ( $n \geq 2$ ) and error values are average deviation of the mean.

**A**

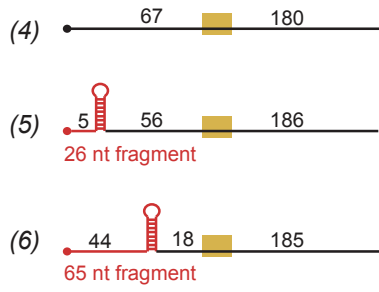

**B**

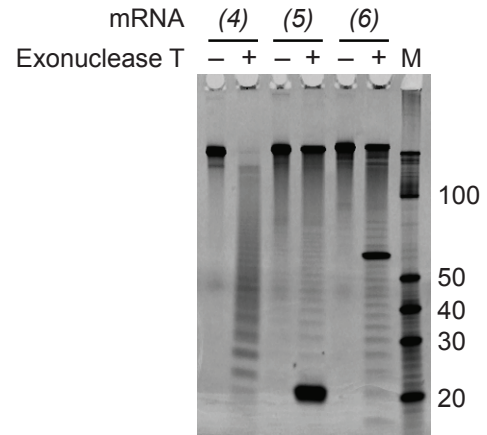

Figure 3 - figure supplement 2.



**Figure 3 – Figure supplement 2.** Evidence that the designed hairpins in the 5'-UTRs of mRNAs 4 and 5 are formed and that mRNA 4 lacks secondary structure. **(A)** RNAs 4-6 used in the study (same as in Figure 3A; shown again here for convenience). The fragments expected to be protected from 3'-5' RNase Exonuclease T digest are indicated in red. **(B)** RNAs 4-6 were incubated in the presence (+) or absence (–) of the 3'-5' RNase Exonuclease T, at the same temperature (26°C) used in all experiments in this study, for 18 hours. Reactions were resolved on a 15% Tris Borate EDTA Urea gel (4 pmol of total RNA per lane) and stained with SYBR Gold nucleic acid gel stain. “M:” Abnova Small RNA Marker. Marker RNA fragment sizes are indicated to the right of the gel.

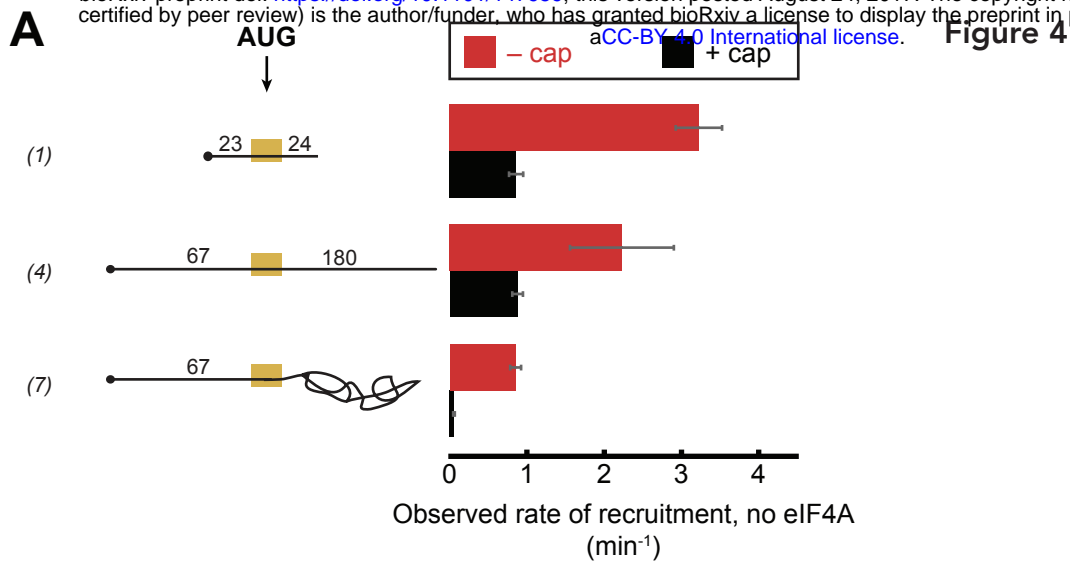

**B**

| mRNA | 5'-cap | $k_{\text{obs}}^{\text{no eIF4A}}$<br>(min <sup>-1</sup> ) | $k_{\text{max}}$<br>(min <sup>-1</sup> ) | $\frac{k_{\text{max}}}{k_{\text{obs}}^{\text{no eIF4A}}}$ | $\frac{k_{\text{obs}}^{\text{no eIF4A}}}{k_{\text{obs}}^{\text{no eIF4A}}}$ |
|------|--------|------------------------------------------------------------|------------------------------------------|-----------------------------------------------------------|-----------------------------------------------------------------------------|
| (1)  | -      | 3.2 ± 0.3                                                  | 5.2 ± 1.0                                | 1.6 ± 0.4                                                 | 3.8 ± 0.5                                                                   |
|      | +      | 0.9 ± 0.1                                                  | 6.2 ± 1.0                                | 7.2 ± 1.4                                                 |                                                                             |
| (4)  | -      | 2.2 ± 0.7                                                  | 9.7 ± 0.7                                | 4.4 ± 1.4                                                 | 2.5 ± 0.8                                                                   |
|      | +      | 0.88 ± 0.07                                                | 6.2 ± 0.8                                | 7.0 ± 1.1                                                 |                                                                             |
| (7)  | -      | 0.85 ± 0.07                                                | 3.9 ± 1.0                                | 4.7 ± 1.2                                                 | 15 ± 3                                                                      |
|      | +      | 0.06 ± 0.01                                                | 3.4 ± 0.6                                | 60 ± 16                                                   |                                                                             |

Figure 4

**Figure 4.** The 5'-7-methylguanosine cap inhibits mRNA recruitment in the absence of eIF4A.

Observed rates of mRNA recruitment ( $\text{min}^{-1}$ ) when eIF4A was not included in the reaction, in the presence (black bars) or absence (red bars) of the 5'-cap. (See Figure 3A Key for explanation of mRNA diagrams). **(B)** The observed rates of recruitment in the absence of eIF4A ( $k_{\text{obs}}^{\text{no eIF4A}}$ ),  $k_{\text{max}}$ , fold enhancement by eIF4A ( $k_{\text{max}}/k_{\text{obs}}^{\text{no eIF4A}}$ ), and fold difference in the absence of eIF4A ( $k_{\text{obs}}^{\text{no eIF4A}} / k_{\text{obs}}^{\text{no eIF4A} + \text{cap}}$ ). The data for the capped mRNAs are reproduced from Figure 3 – figure supplement 1E for comparison purposes. “ND:” not determinable due to low reaction endpoint. All data presented in the figure are mean values ( $n \geq 2$ ) and error bars represent average deviation of the mean. Error was propagated when ratios were calculated.

**A**

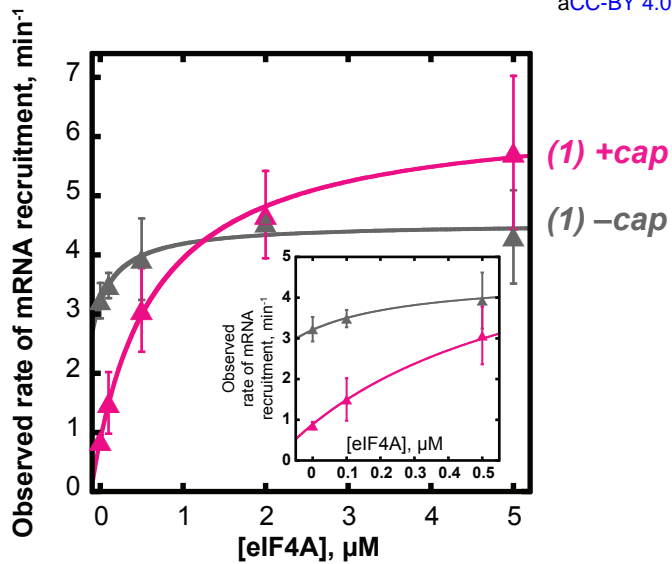

**B**

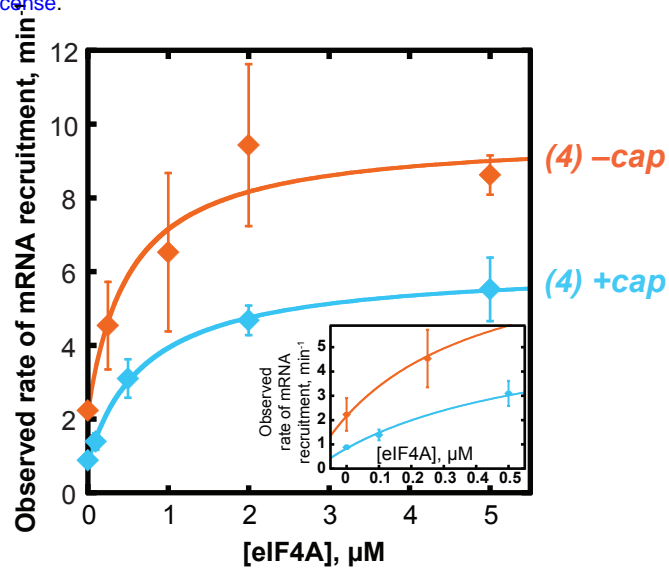

**C**

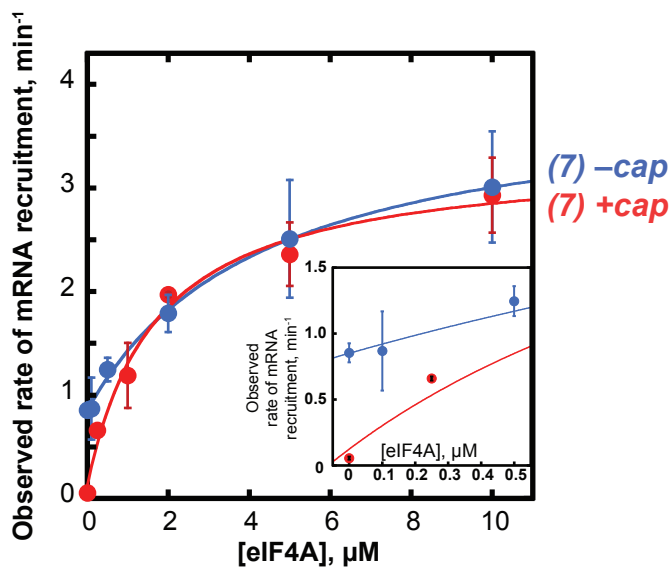

Figure 4 - Supplement 1.

**Figure 4 – Figure supplement 1.** The 5'-7-methylguanosine cap inhibits mRNA recruitment in the absence of eIF4A. mRNA recruitment of **(A)** RNA 1 (CAA 50-mer), **(B)** RNA 4, and **(C)** RNA 7 in the presence or absence of a 5'-cap, as indicated to the right of each curve. Numbers to the right of the plots correspond to RNAs in Figure 3A. Insets show the observed rates versus eIF4A concentration up to 0.5  $\mu$ M to focus on the 0  $\mu$ M eIF4A points. All data presented in the figure are mean values ( $n \geq 2$ ) and error bars represent average deviation of the mean.

**A**

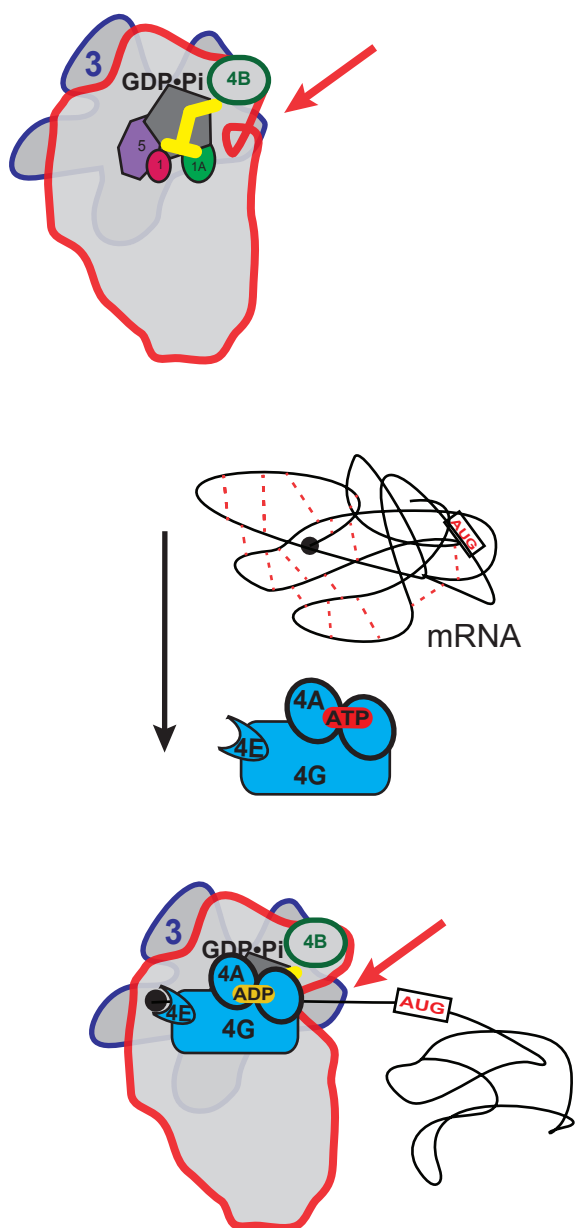

**B**

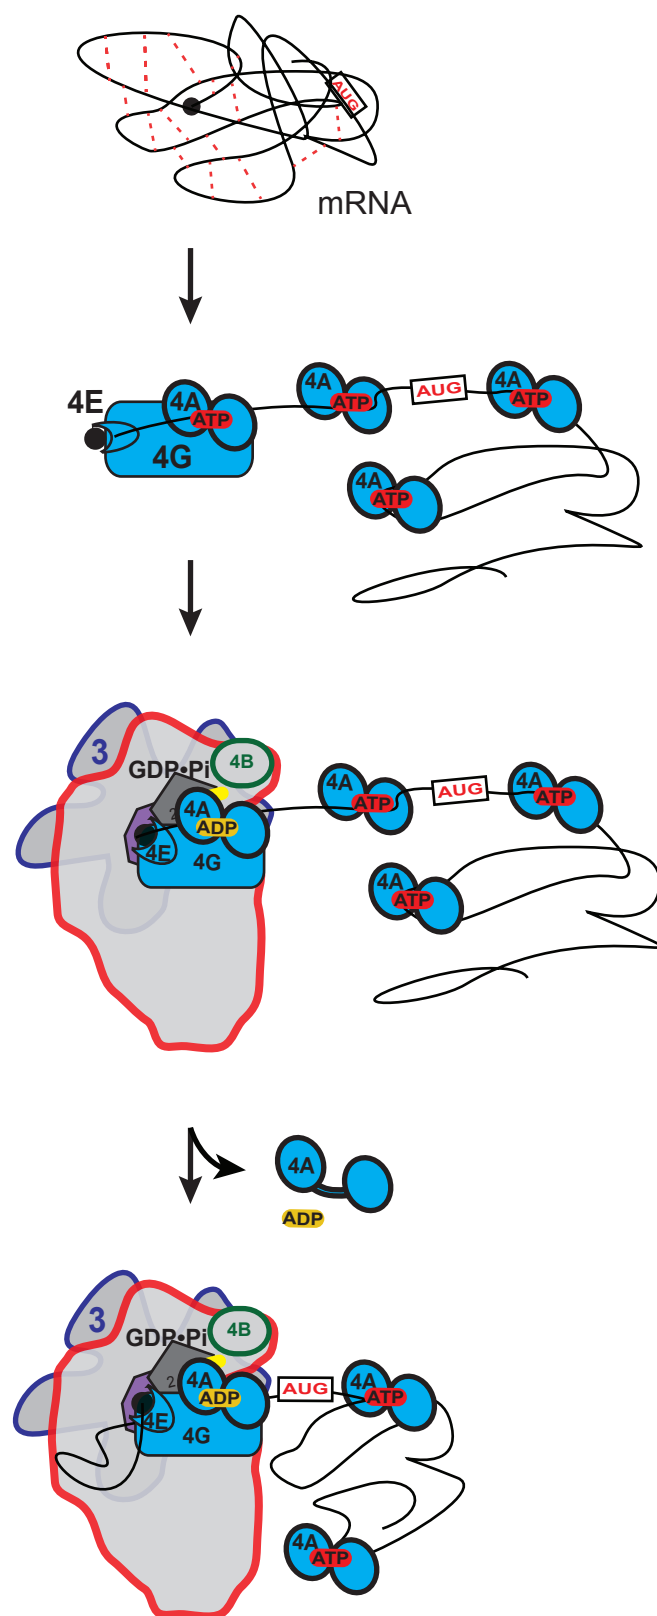

Figure 5.

**Figure 5.** Possible models for the mechanism of action of eIF4A in promoting mRNA recruitment to the PIC. **(A)** eIF4A modulates the conformation of the PIC to promote mRNA recruitment. In this model, binding of eIF4A•4G•4E to the PIC induces an opening of the mRNA entry channel of the 40S subunit (highlighted by red arrows), which enables mRNA binding. The ATPase activity of eIF4A might drive this opening. ATP hydrolysis might also promote loading of the message into the mRNA entry channel, concomitant with any necessary melting of structure. This model is consistent with our observations that the ATPase activity of eIF4A is stimulated by the PIC and that recruitment of unstructured mRNAs is accelerated by ATP hydrolysis by the factor. **(B)** A holistic model for the roles of eIF4A and eIF4F in mRNA recruitment. This model attempts to bring a variety of observations from the literature together with the data presented in this study. mRNAs have complex, often dynamic, structures due to numerous local and distant interactions (red dotted lines) as well as the inherent tendency of polymers longer than their persistence lengths to fold back on themselves. These complex global structures can occlude the 5'-ends of the mRNAs and the start codon, making it difficult for the PIC to bind and locate them. Individual eIF4A molecules might keep the mRNA in a partially-unwound state so that the 5'-end can be located by eIF4F and the PIC. ATP hydrolysis by the eIF4A molecule bound to eIF4F allows it to load the 5'-end of the mRNA into the entry channel of the 40S subunit. Loading might involve opening of the mRNA entry channel or another conformational change in the PIC and active transfer of the mRNA into the channel. After loading of the 5'-end, eIF4A•ADP dissociates from the complex. This allows the next (3') eIF4A molecule on the mRNA to bind to eIF4G, which activates its ATPase, enabling loading of that mRNA segment and thus movement of the PIC down the message. This cycle repeats until the start codon is located. The two models presented in (A) and (B) are not mutually exclusive and it is possible that eIF4A, given its high cellular concentration, performs multiple tasks.
